# Supplementary material for: SLC39-driven zinc influx orchestrates pleiotropic tumor–immune crosstalk to establish an immune-suppressive microenvironment in colorectal cancer
Source: Research Square preprint supplement (doi:10.21203/rs.3.rs-8267774/v1), 2025-12-22
Supplement: Supplementary file 1 [file a3cc04a3cd6daf666ef01a64.xlsx]

## Sheet: Table of contents
Table of contents
Table 1: Clinical data for TCGA cohort
Table 2: Clinical data for CPTAC cohort
Table 3: Clinical data for scATAC-seq cohort (GSE201349)
Table 4: Clinical data for scRNA-seq cohort (syn26844071)
Table 5: Clinical data for ICI treated scRNA-seq cohort (SCP2079)
Table 6: Clinical data for 10x Genomics Visium cohort (GSE225857)
Table 7: Primer sequences for RT-qPCR
Table 8: Clinical data for ICI treated bulk RNA-seq cohort (GSE179351; GSE235919; GSE302922; Github: R-ICI_MNB_Survival)
Table 9: Benchmarking biomarkers

## Sheet: Table 1
Patient	Sex	Age	Pathology_T_stage	Pathology_N_stage	Pathology_M_stage	MSI	OS	OS.time	DSS	DSS.time	DFI	DFI.time	PFI	PFI.time	CMS	Archetype1	Archetype2	Archetype3	Factor1	Factor2	Factor3	Factor4	Factor5	Factor6	Factor7	Factor8	Factor9	Factor10	aDC	Adipocytes	Astrocytes	B.cells	Basophils	CD4..memory.T.cells	CD4..naive.T.cells	CD4..T.cells	CD4..Tcm	CD4..Tem	CD8..naive.T.cells	CD8..T.cells	CD8..Tcm	CD8..Tem	cDC	Chondrocytes	Class.switched.memory.B.cells	CLP	CMP	DC	Endothelial.cells
TCGA.F4.6854.01	female	77	t3	n0	m0	MSS	0	16	0	16	0	16	0	16	CMS2	0.537446	0.266486	0.196069	-0.82961	1.39244	-0.985342	-0.307746	-0.0110044	-0.076068	-0.516926	1.06598	0.508662	-0.915547	0.1367	0.0005	0.0399	0	0.0066	0	0	0	0	0	0.0003	0.0086	0	0	0.0346	0	0.0059	0	0	0.0001	0.0186
TCGA.D5.5538.01	female	60	t3	n1	m0	MSS	1	1661	1	1661	NA	NA	1	1007	NA	0.521302	0.306012	0.172686	-0.971706	-3.42246	0.954711	0.0439445	1.39461	-0.049036	-0.88474	0.0752942	-0.597805	-0.208973	0.2875	0.0033	0.072	0.0337	0.0117	0.005	0	0	0	0	0	0.011	0.0093	0	0.0908	0.0059	0.0125	0.007	0	0.0469	0.0055
TCGA.AA.3511.01	male	64	t4	n0	m0	MSS	0	212	0	212	1	59	1	59	CMS2	0.423338	0.442441	0.134221	-1.13602	0.189789	-2.5998	1.36587	-0.56589	-1.3414	-2.43057	3.1524	-1.77301	0.646129	0.0982	0.0026	0.1312	0	0	0	0	0	0	0	0	0	0	0	0.0292	0.0236	0.0018	0	0	0.0005	0.0247
TCGA.QG.A5YX.01	female	61	t3	n0		MSS	0	1003	0	1003	0	1003	0	1003	CMS3	0.686583	0.102903	0.210514	-0.877155	-2.66953	-0.789036	-1.97379	-0.221862	0.225598	1.37613	-2.16614	0.904576	-0.327828	0.0188	0	0	0.0066	0	0	0	0	0	0	0	0	0	0	0.0481	0	0.0206	0.0012	0	0.0044	0.001
TCGA.G4.6320.01	male	73	t3	n1		MSI	0	804	0	804	NA	NA	0	804	CMS3	0.254118	0.114545	0.631337	2.38329	-0.52745	-0.39031	-0.776333	-0.102095	0.774649	-0.880547	-0.00835384	-1.08303	1.82277	0.1048	0	0	0.0656	0.0153	0	0	0	0.0233	0.0169	0.0021	0.0017	0	0	0.0085	0	0.0261	0	0	0	0
TCGA.CM.6164.01	female	46	t3	n0	m0	MSS	0	883	0	883	NA	NA	0	883	CMS2	0.826551	0.173449	0	-2.50006	2.36875	0.849296	-1.77158	1.82927	0.783658	-0.62605	-3.44234	1.09903	-1.03925	0.1288	0.0008	0.0621	0	0.0348	0	0	0	0	0	0.0037	0.0184	0.0074	0	0.0224	0	0.0011	0.0007	0	0.0013	0.0206
TCGA.A6.A567.01	male	56	t3	n1	m1	MSS	1	1881	1	1881	NA	NA	1	612	CMS2	0.848356	0.151644	0	-2.47724	-1.54905	0.201657	-2.00269	1.44597	-1.95643	-2.50576	-0.642651	0.257064	-0.204966	0	0.0004	0.0431	0	0	0	0	0	0	0	0	0.0086	0	0	0.0251	0.0032	0.0012	0.0125	0	0	0.0042
TCGA.DM.A0X9.01	female	71	t3	n0	m0	MSS	0	3641	0	3641	NA	NA	0	3641	CMS2	0.380572	0.141323	0.478105	1.22624	-2.61666	-0.404639	-0.889453	-0.966988	1.38254	1.42354	1.24289	-1.27449	1.17202	0.0623	0	0.0167	0.0194	0.003	0	0	0	0	0	0.0078	0.0316	0.0216	0	0.0361	0	0.0261	0.0095	0	0.0004	0.0079
TCGA.AY.A69D.01	female	55	t3	n0	m0	MSS	0	543	0	543	0	543	0	543	CMS2	0.351902	0.247232	0.400866	0.732883	0.0610153	0.0737994	0.015587	-2.39298	-2.98233	-0.232673	1.29881	1.83119	-1.65859	0.0565	0.0007	0.0658	0.0521	0.016	0	0.0026	0	0	0	0	0	0	0	0.0435	0	0.0218	0	0	0	0
TCGA.AY.A8YK.01	male	44	t3	n2	m1	MSS	0	573	0	573	NA	NA	0	573	CMS2	0.873121	0.126879	0	-3.17576	-3.16352	0.796127	-2.19752	-0.174479	2.99554	1.26518	1.21956	-0.45591	-0.210239	0.055	0	0.0065	0.0046	0.0106	0	0	0	0.002	0	0	0	0	0	0.0349	0	0.0117	0	0	0.0008	0.0148
TCGA.5M.AAT4.01	male	74	t3	n0	m1	MSS	1	49	1	49	NA	NA	1	49	NA	0.769679	0	0.230321	-0.562559	0.486988	1.00468	-3.78458	1.0597	0.523782	-0.301452	-3.5477	0.625082	0.163706	0.026	0.0012	0	0	0.0059	0	0	0	0	0	0	0.0003	0	0	0.0083	0	0.0129	0.0012	0	0	0.0044
TCGA.CM.6167.01	female	57	t3	n2	m0	MSS	0	456	0	456	NA	NA	0	456	CMS4	0.271341	0.728659	0	-2.23781	1.10509	1.10935	4.03442	-0.224378	2.39099	-1.11969	-0.636155	-0.783657	-1.5251	0.2808	0.014	0.1733	0	0	0	0.016	0	0	0	0	0.0063	0	0	0.0858	0.0988	0	0.0053	0.0101	0.0128	0.1767
TCGA.CM.6168.01	female	84	t3	n0	m0	MSI	0	395	0	395	NA	NA	0	395	CMS4	0.303554	0.508888	0.187557	-0.659599	1.443	1.5022	2.19404	0.239437	0.209881	-0.516863	-0.129814	-0.800239	-1.94305	0.2979	0	0.1574	0.0104	0	0	0.0148	0	0	0	0	0	0.005	0	0.1215	0.0397	0.0151	0.0092	0	0.0329	0.029
TCGA.AZ.4615.01	male	84	t3	n1	m0	MSI	0	1002	0	1002	NA	NA	1	688	CMS1	0.133332	0.205793	0.660875	2.70008	-1.19945	2.03414	0.249159	0.254832	-0.0932065	-0.948255	0.53201	0.509899	0.347576	0.2296	0	0.0648	0.013	0.0318	0.0025	0	0	0	0	0.0025	0.0833	0.1293	0.0311	0.0394	0	0.0155	0.0009	0	0.0143	0
TCGA.AZ.6598.01	female	77	t3	n0		MSI	1	1503	0	1503	0	1503	0	1503	CMS1	0	0.114062	0.885938	4.7355	-0.546322	1.12123	0.202298	-1.96089	1.68299	1.36139	0.944847	-1.32239	0.860355	0.1306	0	0.0582	0.0118	0.0744	0.0001	0	0	0	0.0316	0	0	0.0155	0	0.0539	0	0.0155	0	0	0.018	0.0032
TCGA.A6.6653.01	male	82	t2	n0	m0	MSI	0	742	0	742	0	742	0	742	CMS1	0	0	1	5.1183	0.961261	1.92334	-1.02595	-2.28896	-0.0310943	-0.590592	0.134305	0.128557	-0.62404	0.1501	0.0009	0.0703	0	0.0249	0	0	0	0	0	0	0	0.0053	0	0.0332	0	0.0064	0.0007	0	0.0043	0.0088
TCGA.NH.A50V.01	male	69	t3	n2	m0	MSS	0	588	0	588	0	588	0	588	NA	0.416098	0.268628	0.315274	0.092842	0.157087	1.64655	0.0194318	-0.763136	-0.244046	-0.531135	-0.00848719	-0.191908	0.444911	0.172	0	0.0645	0.0284	0	0.0013	0.0003	0.0051	0.0429	0.0179	0.0015	0.0262	0.011	0	0.0123	0.0269	0.0343	0.0031	0	0.0069	0.0111
TCGA.AD.6899.01	male	84	t4	n2		MSS	1	176	0	176	0	176	0	176	CMS4	0.307217	0.449453	0.24333	-0.286781	-0.899204	-0.463672	1.71792	-1.42597	-0.916686	-0.967317	-3.03176	2.74089	-0.821103	0.2815	0.0008	0.1706	0.0345	0	0	0.0081	0	0	0	0	0.0136	0.0173	0	0.0688	0.0222	0.0118	0.0082	0	0.0134	0.0233
TCGA.G4.6311.01	male	80	t3	n1		MSS	0	1199	0	1199	NA	NA	0	1199	CMS4	0.421421	0.470965	0.107614	-1.31371	0.45491	-1.43819	1.59478	-0.0741738	2.35138	-1.08426	-0.177592	-1.02648	-0.5617	0.1495	0.0007	0.1129	0.1254	0.0086	0	0	0	0	0	0	0	0	0	0.0375	0	0.0271	0.0008	0	0.0111	0
TCGA.NH.A6GC.01	female	66	t4	n1	m1	MSS	0	389	0	389	NA	NA	0	389	CMS3	0.60525	0.142087	0.252663	-0.513627	-0.938874	-0.274643	-1.45807	-1.23395	0.498616	1.34277	-2.80478	0.410966	0.173869	0.027	0.0049	0.147	0.0142	0	0	0	0	0.0355	0.0534	0.0011	0.0093	0	0	0.0247	0.0211	0.0303	0	0	0	0
TCGA.F4.6570.01	female	78	t3	n0	m0	MSI	1	188	0	188	NA	NA	0	188	CMS1	0.0376446	0.30411	0.658246	2.77539	-0.978024	2.24768	1.26597	-0.537719	1.0237	-1.00916	-0.421061	-0.666051	-0.682577	0.2613	0	0.1168	0.0496	0.062	0	0.0289	0	0	0.0279	0.0011	0.05	0.0646	0.0207	0.0939	0.0242	0.0228	0	0	0.024	0.0212
TCGA.G4.6627.01	male	84	t3	n0	m0	MSS	0	2275	0	2275	1	1003	1	1003	CMS4	0.299807	0.531189	0.169005	-0.781157	1.56247	1.35592	2.37875	-0.0208842	0.556491	3.8274	-1.42143	-0.259096	0.288031	0.2834	0.0045	0.1426	0.0468	0	0	0.0022	0	0	0	0.0025	0.0128	0.0326	0	0.0687	0.0152	0.0249	0.0003	0	0.0239	0.0442
TCGA.CM.6679.01	male	58	t3	n0	m0	MSS	0	306	0	306	NA	NA	0	306	CMS4	0.630295	0.317872	0.0518329	-1.89327	1.13517	-0.242335	-0.141665	-0.10967	-0.372381	-0.580814	0.301276	-0.19306	-1.0331	0.1268	0.0022	0.181	0.0182	0	0	0.0184	0	0.0102	0	0.0035	0.0146	0.0004	0	0.0461	0.0249	0.0146	0	0	0.006	0.0138
TCGA.A6.4105.01	male	79	t3	n0	m0	MSS	1	442	0	442	NA	NA	1	364	NA	0.43585	0.156809	0.407341	0.694941	1.52388	-0.0815828	-0.909208	-0.782265	-0.741619	4.15987	-0.562747	0.530401	-0.318385	0.2696	0.002	0.1054	0.0067	0.0669	0	0	0	0	0	0.0042	0.0261	0.0367	0	0.0541	0	0.0019	0.0085	0	0.0197	0.0073
TCGA.D5.6924.01	male	68	t3	n0	m0	MSS	0	435	0	435	NA	NA	0	435	CMS4	0.378213	0.523427	0.0983596	-1.33415	-0.653605	-2.04154	2.11727	-0.416699	-1.24427	3.57537	-0.586106	0.587511	-1.40249	0.1834	0	0.1711	0.0281	0	0	0.0145	0	0	0	0.001	0.0178	0.0142	0.002	0.0553	0.0152	0.0042	0.0048	0	0.0141	0.0303
TCGA.AD.6965.01	male	62	t4	n2	m0	MSS	0	805	0	805	1	648	1	648	CMS2	0.595137	0.0787219	0.326141	-0.00792751	-1.82844	-2.60568	-1.92981	1.90075	-0.33559	1.35605	-1.00676	1.21275	-1.79102	0.0362	0	0.0238	0.0106	0	0	0	0	0	0	0.0007	0.0045	0.0057	0	0.0182	0	0.0177	0.0033	0	0	0.0071
TCGA.D5.6931.01	male	77	t4	n2	m0	MSS	0	365	0	365	NA	NA	0	365	NA	0.12973	0.367506	0.502764	1.63658	-1.46483	-0.341766	1.52832	0.845535	1.53773	0.953712	2.24865	0.0596529	-1.62531	0.249	0	0.0884	0.0559	0	0.0045	0.0047	0	0	0	0	0.021	0.0244	0	0.0873	0	0.0294	0.0029	0	0.0331	0.0067
TCGA.A6.5656.01	male	74	t2	n0	m0		0	1001	0	1001	0	1001	0	1001	NA	0.364204	0.402941	0.232856	-0.412887	0.555212	-3.5962	1.20692	-0.798399	-0.59696	-0.569664	0.603245	-0.778763	0.314632	0	0	0.0515	0	0	0.0059	0.0046	0.0093	0	0	0.0049	0.0194	0	0	0.0596	0.0031	0.015	0	0	0.006	0
TCGA.DM.A1DA.01	female	71	t3	n2	m0	MSS	1	228	NA	228	NA	NA	0	228	NA	0.24148	0	0.75852	3.30532	-3.06984	-0.918367	-1.79889	0.0328459	1.51006	0.0363829	-3.39892	-0.367753	1.67316	0.0737	0	0	0.0031	0.0674	0	0	0	0	0	0.0007	0	0	0	0.0056	0	0.0065	0.0002	0	0.0031	0
TCGA.F4.6461.01	female	41	t4	n2	m0	MSS	1	338	1	338	NA	NA	1	288	CMS3	0	0.373101	0.626899	2.9027	4.03752	0.860862	2.16376	1.0635	-0.10079	-1.04576	0.537366	-0.165262	0.146322	0.2243	0.0015	0.0761	0.2617	0	0	0.001	0	0.0051	0	0	0	0	0	0.0481	0.0235	0.0446	0	0	0.0088	0.019
TCGA.F4.6703.01	male	64	t3	n0	m0	MSI	0	1456	0	1456	0	1456	0	1456	CMS4	0.246016	0.746989	0.00699515	-1.82217	1.34155	3.29887	4.21105	1.09837	-0.136966	1.51669	1.63515	0.0600079	-0.273854	0.4755	0.1201	0.2624	0.0621	0.0849	0	0.028	0	0	0	0	0.0153	0.0513	0.0026	0.141	0.0965	0.0022	0	0	0.0691	0.0805
TCGA.AA.3492.01	female	90	t3	n0	m0	MSI	1	92	0	92	NA	NA	0	92	CMS1	0.120982	0.025328	0.85369	4.01328	-0.488658	1.27378	-1.13646	-1.00759	0.0756533	-0.797651	0.189594	-0.129353	1.19415	0.2226	0.0016	0.0201	0.0033	0.0239	0.0021	0	0	0	0	0.0016	0.0043	0.0195	0	0.0154	0	0.0174	0.0065	0	0.0078	0.0017
TCGA.G4.6293.01	female	49	t3	n1	m0	MSS	0	4051	0	4051	0	4051	0	4051	CMS2	0.376041	0.33939	0.284569	-0.075414	0.47182	-0.0231421	0.677577	1.09144	0.0503518	-0.562502	0.209882	-1.10059	0.265962	0.1539	0	0.0375	0.0496	0.0144	0.0012	0.0271	0	0.0061	0.0088	0.0006	0.0209	0.0289	0	0.0543	0	0.0414	0	0	0.0034	0.0156
TCGA.AA.3496.01	female	83	t3	n0	m0	MSI	0	31	0	31	NA	NA	0	31	CMS2	0.491007	0.284393	0.2246	-0.591911	0.55431	-0.75081	-0.0483515	0.324022	0.294452	1.45814	-2.07381	0.661081	-0.690427	0.2276	0.0004	0.12	0.024	0	0	0.0298	0	0	0	0	0.0201	0.0119	0	0.096	0.0036	0.0198	0.0042	0	0.0194	0.0261
TCGA.DM.A28E.01	female	72	t3	n0	m0	MSS	0	3648	0	3648	NA	NA	0	3648	CMS2	0.750769	0.0723875	0.176844	-1.1668	-0.970358	-0.496373	-2.37759	-1.95077	0.00255569	-0.29038	0.456494	0.30423	-0.169105	0.0133	0	0	0.0042	0.0227	0	0.0008	0	0.0128	0	0	0.016	0	0	0.0116	0	0.0112	0.0028	0	0	0.0028
TCGA.CK.6747.01	female	87	t3	n0		MSS	0	2523	0	2523	0	2523	0	2523	CMS3	0.47622	0.143662	0.380118	0.47197	-0.508984	-0.117136	-1.1157	-0.644959	0.0151543	-0.539898	0.619758	0.178428	-0.610714	0.1172	0	0.0406	0.0028	0	0	0	0	0	0	0	0	0	0	0.0458	0	0.0192	0	0	0	0.0114
TCGA.CA.5255.01	male	45	t3	n0	m0	MSS	0	376	0	376	0	376	0	376	CMS3	0.357599	0.388561	0.25384	-0.264855	1.27786	1.6303	1.11088	-0.617104	-0.100559	1.98329	1.48052	-0.737929	2.02857	0.0178	0	0	0	0	0	0	0	0	0	0.0024	0	0	0	0.0314	0	0.0138	0.0038	0	0	0
TCGA.CK.4947.01	female	46	t4	n1	m0	MSS	0	534	0	534	NA	NA	1	21	CMS2	0.400539	0.306633	0.292829	-0.0434968	-0.935523	0.755058	0.357673	0.315484	0.167546	-0.608314	-0.0751306	-0.934478	-0.939694	0.2322	0.0016	0.0715	0.0553	0	0.0076	0.0042	0	0	0	0	0.0288	0.0518	0	0.1205	0.0084	0.0298	0.0105	0	0.0185	0.0099
TCGA.AD.6888.01	male	73	t3	n1	m0	MSS	1	472	1	472	1	343	1	343	CMS2	0.530591	0.326848	0.142561	-1.18404	0.200013	-2.91969	0.183815	0.883015	1.8456	1.02018	-1.30312	1.44598	1.30907	0	0	0	0	0.0292	0	0	0	0	0	0	0	0	0	0.0153	0	0.0059	0	0	0	0
TCGA.F4.6809.01	female	52	t3	n1	m1	MSS	1	403	1	403	NA	NA	1	403	CMS4	0.430117	0.378835	0.191047	-0.759123	2.40542	1.24158	0.849039	-0.561575	-0.378052	-0.3664	0.648276	0.598125	0.664992	0.3294	0.093	0.1039	0.0855	0	0	0.0017	0	0.0167	0	0.0014	0.0277	0.0094	0	0.0324	0.0564	0.0217	0	0	0.0099	0.0672
TCGA.CK.5914.01	male	81	t3	n1		MSS	0	669	0	669	NA	NA	0	669	CMS2	0.507943	0.173049	0.319007	0.028722	1.43467	-2.10455	-0.966055	-1.85048	1.58943	1.41522	-2.29818	0.644827	-0.832555	0.1026	0.0025	0.0354	0.0016	0.0089	0.0011	0	0	0	0	0.0071	0.0427	0.0252	0	0.0396	0	0.0008	0.0185	0	0.0009	0.0025
TCGA.D5.6532.01	male	61	t3	n0	m0	MSS	0	555	0	555	NA	NA	0	555	CMS2	0.663169	0.118285	0.218546	-0.800183	-1.74332	-0.989488	-1.79311	-0.0931127	-0.0648914	-0.509196	-0.0693819	-1.27661	-0.906646	0.0178	0.0003	0	0.0097	0	0	0	0	0	0	0.0005	0.0187	0.0016	0	0.0042	0	0.0026	0.0034	0	0	0.0045
TCGA.3L.AA1B.01	female	61	t2	n0	m0	MSS	0	475	0	475	0	475	0	475	CMS2	0.383373	0.451717	0.16491	-0.890054	-0.444772	-0.00332317	1.54093	-0.390342	1.63573	3.35102	-0.544754	1.3867	-0.254842	0.1613	0.0008	0.0595	0.0418	0	0	0.0145	0	0.0267	0	0.0001	0.0079	0	0	0.0565	0.0112	0.0212	0	0	0.0065	0.0094
TCGA.G4.6588.01	female	58	t3	n0	m0	MSI	0	796	0	796	NA	NA	0	796	CMS1	0.0776585	0.207185	0.715157	3.12054	-0.081793	2.17072	0.402472	-0.288983	-0.0816209	-0.754533	-0.0509495	-0.457673	-0.0678547	0.113	0.0002	0.0664	0.0023	0.0564	0	0	0	0	0	0.0008	0	0.0016	0	0.0419	0	0.0066	0.0021	0	0.0103	0.0019
TCGA.A6.6138.01	male	61	t2	n0	m0	MSS	0	685	0	685	NA	NA	0	685	NA	0.264029	0.479464	0.256508	-0.155857	1.1737	-1.35703	2.06406	-0.701916	-1.74081	-0.306566	0.102129	-1.1864	-0.879479	0.3713	0.0007	0.0444	0.0459	0.0308	0.0013	0.0246	0	0	0	0	0.0369	0.0601	0	0.1095	0	0.033	0	0	0.0334	0.0443
TCGA.F4.6808.01	female	54	t1	n0	m0	MSS	0	1024	0	1024	0	1024	0	1024	CMS2	0.775947	0.142546	0.0815062	-1.83466	0.617086	-0.833995	-1.89102	1.72319	-2.36555	0.130694	0.696973	-1.18384	0.80494	0.0023	0.0031	0	0	0.0176	0	0	0	0	0	0.0111	0.0042	0	0	0	0	0.0068	0.0007	0	0	0.0061
TCGA.G4.6317.01	female	51	t3	n2			0	1095	0	1095	NA	NA	1	592	CMS2	0.490323	0.270721	0.238955	-0.494368	0.487816	-3.04488	-0.153964	-0.9304	-1.50613	-2.50712	-0.706962	-0.316455	1.85953	0	0	0	0	0.0117	0	0	0	0	0	0.0081	0.0039	0	0	0	0	0.0017	0	0	0	0
TCGA.CK.4952.01	female	48	t4	n2	m0	MSS	0	475	0	475	NA	NA	0	475	CMS3	0.235738	0.0840993	0.680163	2.73066	-4.79986	0.661687	-0.968416	1.1019	0.122605	1.14242	1.21706	-1.61967	-0.521128	0.0515	0	0.0136	0.0082	0.0248	0	0	0	0	0.0036	0	0	0	0	0.0564	0	0.007	0.0121	0	0.0071	0.0053
TCGA.G4.6309.01	female	40	t3	n1	m0	MSI	0	2600	0	2600	1	2176	1	2176	CMS1	0.483855	0.258911	0.257234	-0.364725	-0.100512	-0.355524	-0.230167	0.69407	-0.122696	-0.619368	0.542019	-0.374051	-0.0167697	0.0622	0	0.0004	0.0052	0.0285	0	0	0	0	0	0.0076	0.0094	0.0061	0	0.0246	0	0.0109	0.0083	0	0.0089	0.0035
TCGA.CM.5868.01	female	59	t4	n1	m1	MSS	0	518	0	518	NA	NA	0	518	NA	0.835863	0.106069	0.0580675	-2.0511	1.53779	0.614992	-2.33072	1.32327	0.962322	1.60074	-2.37635	0.258938	0.425571	0.0502	0.0206	0.0853	0	0.0033	0	0	0	0	0	0.0028	0.0094	0	0	0.0207	0.0265	0.0041	0	0	0	0.0031
TCGA.AD.6964.01	male	58	t4	n2		MSI	1	331	1	331	NA	NA	1	325	CMS4	0.325999	0.527821	0.14618	-0.960657	-0.155421	1.33608	2.28532	2.32126	-0.0741089	-0.997075	0.903433	0.569246	1.05329	0.3397	0.0136	0.1518	0.073	0.0323	0	0.0272	0	0	0.0225	0.0078	0.0966	0.0848	0.027	0.0847	0.0503	0.0418	0.0058	0	0.0261	0.0316
TCGA.G4.6295.01	female	70	t3	n0	m0	MSS	0	254	0	254	NA	NA	0	254	NA	0.859487	0.130352	0.0101614	-2.39736	-3.0522	-0.453052	-2.20044	4.28091	-3.38701	1.86731	-2.27821	-1.12685	-1.66825	0.2889	0	0.0213	0.1142	0.087	0.0083	0.0014	0	0	0	0.0053	0.0601	0.0749	0	0.0932	0	0.0426	0.0009	0	0.0319	0.0048
TCGA.NH.A50T.01	female	68	t3	n0		MSS	0	553	0	553	0	553	0	553	CMS2	0.432832	0.273232	0.293936	-0.0674273	-1.27236	-3.74612	0.0127869	1.11193	-1.81535	1.57345	-1.94974	-0.543091	1.42643	0.0134	0	0.0229	0	0.0516	0	0	0	0	0	0.0031	0	0	0	0.012	0	0.0055	0.0107	0	0	0.0002
TCGA.D5.5539.01	male	60	t3	n1	m0	MSS	0	596	0	596	NA	NA	1	579	CMS3	0.427312	0.385446	0.187242	-0.782079	-2.43754	0.51593	0.908126	-1.9599	2.97909	-1.24536	-0.382974	0.0810103	0.55127	0.1557	0	0.0643	0.0046	0	0	0	0	0	0.0003	0.0011	0	0	0	0.0844	0	0.0039	0.0122	0	0.0146	0.0096
TCGA.AZ.4315.01	male	61	t3	n0	m0	MSS	0	1776	0	1776	NA	NA	0	1776	NA	0.449242	0.235412	0.315345	0.0610937	-0.85519	1.80732	-0.326185	-1.10375	0.105317	-0.505938	0.0193382	0.0247681	1.92877	0.2022	0.0032	0.0405	0.0204	0.0374	0.0045	0	0	0	0	0.0105	0	0.0232	0	0.0079	0	0.0155	0.0271	0	0.006	0
TCGA.AA.3506.01	male	77	t2	n0	m0	MSS	0	1765	0	1765	NA	NA	0	1765	CMS2	0.461512	0.268544	0.269944	-0.257226	-3.13966	-0.385641	-0.097382	0.282317	1.16619	1.28109	1.62086	-0.786914	0.797306	0.1539	0.0044	0.1064	0.0038	0.0339	0	0	0	0	0	0	0	0	0	0.0501	0	0.0101	0.005	0	0.0091	0.0029
TCGA.AU.6004.01	female	69	t2	n0	m0	MSI	0	824	0	824	NA	NA	0	824	CMS1	0.139884	0.378219	0.481897	1.48589	0.739447	2.77938	1.58647	-0.370276	-0.00847429	-0.631543	-0.340406	-0.624677	-0.569048	0.2779	0.0006	0.0974	0.0673	0.0207	0	0.0095	0.0006	0	0	0	0.0136	0.022	0	0.066	0.0006	0.0313	0.0012	0	0.029	0.0158
TCGA.AY.6386.01	female	66	t3	n1	m0	MSS	0	542	0	542	0	542	0	542	CMS3	0.381414	0.228247	0.39034	0.633148	-0.772982	1.21128	-0.208985	-0.552939	0.103003	-0.513187	-0.43103	-1.19773	-0.00525624	0.137	0	0	0.0174	0	0	0	0	0	0.0041	0	0	0	0	0.084	0	0.0231	0	0	0.0097	0.0057
TCGA.A6.5661.01	female	80	t3	n0	m0		0	1020	0	1020	0	1020	0	1020	CMS1	0.0894574	0.1812	0.729343	3.2048	1.30653	1.3056	0.168234	-0.970237	0.262626	-0.801261	1.17107	1.53351	0.803523	0.1616	0	0.0539	0.0477	0	0.0075	0	0.0054	0	0	0.0017	0.0112	0.015	0	0.0369	0	0.0258	0.0107	0	0.009	0.0011
TCGA.CA.5797.01	male	56	t3	n0	m0	MSS	0	383	0	383	0	383	0	383	CMS2	0.789402	0.200107	0.0104906	-2.32698	-2.20771	-0.472624	-1.47341	3.32633	-2.54235	0.154039	0.635902	-1.79453	-1.04208	0.1427	0.0027	0.079	0	0	0	0	0	0	0	0.0072	0.0222	0.0195	0	0.0214	0.018	0	0.0112	0	0.0013	0.0256
TCGA.A6.5662.01	male	46	t3	n2	m1		0	718	0	718	NA	NA	1	495	CMS2	0.699511	0.11921	0.181279	-1.08702	2.21445	-1.81769	-1.87879	-0.492351	-0.992985	0.25921	2.05506	1.25734	-0.414515	0.0397	0.003	0	0	0	0	0	0	0	0	0.0095	0.0149	0.001	0	0.0194	0	0.0034	0.0021	0	0.0012	0.0089
TCGA.AA.3489.01	male	75	t3	n0	m0	MSS	1	214	1	214	NA	NA	1	214	CMS4	0.364827	0.575562	0.0596105	-1.58262	1.74286	2.01483	2.56093	0.419659	-0.0508519	-0.510317	-0.186051	-0.661007	-0.900299	0.373	0.1294	0.1652	0.3475	0.0056	0	0.0128	0	0	0	0	0.0243	0.0379	0	0.1134	0.0859	0.0549	0.0035	0.0038	0.0435	0.07
TCGA.DM.A1D8.01	female	50	t3	n1		MSS	1	383	NA	383	NA	NA	0	383	NA	0.448402	0.105341	0.446257	0.945356	1.32103	-0.516908	-1.34549	-0.693763	0.195111	-2.68659	-1.502	-0.93558	1.59096	0.0174	0	0	0	0.0027	0	0	0	0.0193	0	0.002	0.0191	0.0059	0	0.0099	0	0.0114	0	0	0	0
TCGA.AZ.6599.01	male	72	t2	n0		MSS	1	206	0	206	0	206	0	206	CMS3	0.435555	0.0898997	0.474545	1.14875	-3.73248	-0.124511	-1.4339	0.477186	0.042322	1.36848	1.78768	-0.722631	0.0959079	0	0	0	0.0232	0	0	0	0	0.0059	0.0617	0	0.0171	0.0054	0	0.0202	0	0.0278	0	0	0	0.0046
TCGA.G4.6299.01	male	69	t3	n2	m0	MSS	0	2268	0	2268	NA	NA	0	2268	CMS1	0.204161	0.207931	0.587908	2.13879	1.48681	2.52467	0.0848059	-0.314391	3.16412	2.45518	-2.03158	0.3323	-0.627548	0.2592	0	0.0358	0.0323	0.0595	0	0	0	0.0227	0	0.0027	0.0363	0.0445	0.0001	0.0272	0.0348	0.0273	0	0	0.0226	0.0027
TCGA.AD.5900.01	male	67	t2	n0		MSI	0	370	0	370	0	370	0	370	CMS1	0.00708342	0.357687	0.63523	2.64979	0.776739	1.67875	1.76487	0.607048	0.0842814	1.13369	3.42001	2.44802	0.955106	0.2235	0.0017	0.0737	0.0509	0.0861	0	0	0	0	0	0.0008	0.0189	0.0466	0	0.0719	0	0.0154	0	0	0.0261	0.004
TCGA.A6.5666.01	male	78	t4	n0	m0	MSS	0	995	0	995	1	509	1	509	CMS2	0.641501	0.146395	0.212103	-0.822591	-1.65611	-1.92348	-1.51695	0.733203	0.39615	0.748509	1.1275	6.16671	0.962151	0	0	0	0	0	0.0012	0	0.0017	0	0	0.0056	0.0039	0.0102	0	0.0276	0	0	0.0261	0	0	0.006
TCGA.DM.A1D7.01		82					1	405	NA	405	NA	NA	1	80	NA	0.594973	0.193777	0.21125	-0.783103	0.918389	0.133611	-1.02585	-1.18445	-0.249245	0.166823	-0.306808	-1.64255	1.17547	0.0582	0.0027	0.0122	0	0.0005	0	0	0	0	0	0.0065	0.0081	0.0046	0	0.0211	0	0.0201	0	0	0.0033	0.0089
TCGA.CM.6676.01	male	82	t2	n0	m0	MSS	0	337	0	337	NA	NA	0	337	CMS2	0.594148	0.311811	0.094041	-1.57328	2.08381	-1.22693	-0.0968146	0.369078	-0.298105	-0.259909	1.02173	0.0260237	-0.306685	0.0621	0.0047	0.0727	0	0.0014	0	0	0	0	0	0.0005	0	0	0	0.0268	0.0294	0	0	0	0	0.0083
TCGA.G4.6626.01	male	90	t3	n0	m0	MSS	1	1422	0	1422	NA	NA	0	1422	CMS2	0.622694	0.243037	0.134269	-1.32956	2.48791	-2.38252	-0.709914	0.335048	-0.0859359	-0.258353	0.713339	-0.880244	0.0358084	0.0444	0.0002	0	0.0168	0.0343	0	0	0	0	0	0.0023	0.0038	0	0	0	0	0.0173	0.0031	0	0	0.0045
TCGA.AA.3660.01	female	51	t3	n0	m0	MSS	0	2375	0	2375	0	2375	0	2375	CMS2	0.459858	0.200779	0.339363	0.212852	-0.209241	-1.5592	-0.625316	-1.15596	1.45614	0.73855	1.17866	-0.753996	0.186228	0.0962	0.0019	0.0504	0	0	0	0	0	0	0	0.002	0	0	0	0.0523	0	0.0016	0.0174	0	0.0106	0.0082
TCGA.NH.A8F7.01	female	53	t3	n0			0	543	0	543	NA	NA	0	543	CMS2	0.820928	0.125937	0.0531354	-2.06986	-0.77397	-2.32179	-2.1365	-0.416313	0.258551	1.49225	-2.53595	-0.0736265	-1.37835	0	0	0	0	0.0152	0	0	0	0.0091	0	0	0	0	0	0.0169	0	0	0.0023	0	0	0
TCGA.AA.3712.01	male	65	t3	n2	m0	MSS	0	0	0	0	NA	NA	0	0	CMS2	0.389313	0.451119	0.159568	-0.931878	-1.22551	-3.38115	1.52104	-0.219218	-0.376187	-0.363244	-0.100015	-2.27733	-0.703965	0.1021	0.0005	0.1021	0	0.0282	0	0	0	0	0	0	0	0	0	0.0398	0	0.0014	0.0066	0	0.0058	0.0126
TCGA.CM.4743.01	male	69	t3	n0	m0	MSI	0	701	0	701	0	701	0	701	CMS1	0.178109	0.427777	0.394113	0.856317	0.400961	3.33979	1.8779	0.21031	-0.0532792	-0.65242	-0.404664	-0.67854	3.02846	0.1298	0	0.0244	0.013	0.1198	0	0	0	0	0	0.004	0	0.0074	0	0.0282	0	0.0264	0	0	0.0013	0.0206
TCGA.G4.6315.01	male	66	t3	n1	m1	MSS	0	1883	0	1883	NA	NA	0	1883	CMS2	0.565702	0.256464	0.177834	-0.980146	0.827206	-1.54205	-0.458709	-0.997579	-3.1351	-2.0809	-1.21907	-0.92673	0.0530499	0.0198	0	0	0.0261	0.0109	0	0	0	0	0	0	0	0	0	0.0106	0	0.0165	0	0	0	0.0326
TCGA.CM.4747.01	male	47	t4	n1	m1	MSS	0	761	0	761	NA	NA	0	761	CMS2	0.520572	0.22041	0.259018	-0.388391	-0.973284	0.542963	-0.626427	-1.36374	0.388916	1.53112	1.85969	0.371563	1.4478	0.1108	0.0038	0.0609	0	0	0	0.0037	0	0.0048	0	0.0013	0.0102	0	0	0.0147	0	0.0082	0.0055	0	0.0019	0.0059
TCGA.AZ.6606.01	male	81	t4	n2	m1	MSS	1	357	1	357	NA	NA	1	357	CMS1	0.149229	0.155087	0.695684	2.91953	1.49307	-0.346748	-0.189693	-2.16112	1.61676	-0.733132	0.631337	0.492521	-0.270196	0.0347	0	0	0.0147	0	0.0015	0	0	0	0	0.0001	0	0.006	0	0.0147	0	0.0167	0.0074	0	0.0018	0.0089
TCGA.DM.A285.01	female	71	t3	n2	m1	MSS	1	179	NA	179	NA	NA	0	179	NA	0.419981	0.318828	0.26119	-0.275913	-1.71428	-0.661395	0.403721	1.36481	0.850569	-1.05886	0.243118	-0.80082	-0.0777478	0.0272	0.0007	0.0953	0	0	0	0	0	0	0	0	0	0	0	0.0043	0.0382	0	0	0	0	0
TCGA.A6.6142.01	female	56	t3	n1	m1	MSS	0	763	0	763	NA	NA	1	654	CMS4	0.698744	0.301256	0	-3.04821	-0.0372451	0.861634	-0.378219	2.93552	1.29837	1.52545	1.47459	-1.56509	-0.388409	0.1123	0.0033	0.1937	0	0.0021	0	0	0	0	0	0	0	0	0	0.0262	0.0409	0	0	0	0.0038	0.0381
TCGA.CM.6171.01	female	77	t2	n0	m0	MSI	0	427	0	427	NA	NA	0	427	CMS3	0.112636	0.147537	0.739826	3.253	-1.31661	2.45219	-0.155399	-1.89993	0.0834806	1.45981	1.41286	0.0733315	-2.65947	0.1332	0	0	0.0293	0	0.0043	0	0	0.0064	0	0	0.0082	0.0112	0	0.0503	0	0.0525	0.0028	0	0.0072	0.008
TCGA.A6.2675.01	male	78	t3	n0		MSS	0	1321	0	1321	0	1321	0	1321	CMS4	0.825722	0.174278	0	-2.48344	1.35788	0.829329	-1.76442	0.480181	1.53222	-0.423532	-0.00301291	-0.742732	-1.46547	0.2106	0.0051	0.1467	0.0104	0	0	0.0055	0	0	0	0.0003	0.0023	0.0053	0	0.0819	0.0214	0.0067	0	0	0.0209	0.0083
TCGA.G4.6298.01	male	90	t4	n1		MSS	1	715	1	715	NA	NA	1	291	CMS2	0.619439	0.223256	0.157305	-1.17094	0.754871	0.119649	-0.856927	-0.853713	-0.228671	-0.121979	-0.137653	-1.11574	1.59082	0.0151	0.0022	0.0693	0	0	0	0	0	0	0	0	0	0	0	0.006	0	0.001	0	0	0	0
TCGA.CM.6163.01	male	74	t1	n0	m0	MSS	0	427	0	427	NA	NA	0	427	NA	0.33859	0.509617	0.151793	-0.935022	0.937142	-1.37846	2.11016	-1.35084	-0.665734	-0.715665	-4.0428	0.54833	-0.0853684	0.2188	0.0025	0.0427	0.0466	0.0286	0.0017	0.0033	0	0	0	0.0038	0.029	0.0208	0	0.0669	0.009	0.0191	0.0045	0	0.0117	0.003
TCGA.AM.5820.01	female	59	t4	n2	m1	MSS	0	14	0	14	NA	NA	0	14	NA	0.586777	0.161303	0.251919	-0.500679	-0.529825	-0.304353	-1.25992	0.639923	-0.95448	-0.423685	1.03025	0.326833	-0.324354	0.0739	0.0024	0.019	0	0	0	0	0	0	0	0	0	0	0	0.002	0	0	0.0267	0	0	0.0202
TCGA.A6.6654.01	female	65	t3	n1	m0	MSS	0	726	0	726	0	726	0	726	CMS4	0.143679	0.738879	0.117441	-0.977305	1.46242	-0.65567	4.40907	-0.532236	-0.807252	3.50894	-0.831268	0.680894	-1.2256	0.5352	0.0005	0.1968	0.0334	0.0077	0	0.0343	0	0	0	0	0.0364	0.0288	0	0.1466	0.0353	0.016	0	0	0.0691	0.0538
TCGA.CK.5912.01	male	81	t2	n0		MSS	1	1493	0	1493	0	1493	0	1493	CMS2	0.694718	0.258919	0.0463633	-1.99283	-2.32833	-2.70988	-0.769394	0.307301	-2.66148	-2.74102	-0.685699	-0.0973847	-2.07611	0.0615	0	0.0181	0	0.0339	0.0025	0	0	0	0	0	0.0099	0	0	0.0256	0.0001	0.0041	0.0025	0	0.0041	0.0209
TCGA.CM.5349.01	female	68	t3	n0	m0	MSS	0	915	0	915	NA	NA	0	915	CMS4	0.24782	0.524454	0.227726	-0.334323	0.494012	-0.527384	2.45882	-1.85448	-0.724066	-0.154751	0.0885398	-0.696186	1.56998	0.2091	0.0032	0.1342	0.0277	0	0	0	0	0	0	0.0081	0	0	0	0.0435	0.0135	0.017	0	0	0.0135	0.0125
TCGA.DM.A28A.01	male	78	t3	n2	m0	MSS	1	805	NA	805	NA	NA	0	805	NA	0.662528	0	0.337472	0.00404199	1.93174	0.0202784	-2.72351	-2.05973	-1.67812	0.282691	0.455386	-0.198441	-1.52036	0.0708	0.0003	0.0749	0	0	0	0	0	0.0008	0	0.002	0.0063	0.0033	0	0.0235	0	0	0.0032	0	0	0
TCGA.WS.AB45.01	female	52	t3	n0		MSI	0	2130	0	2130	0	2130	0	2130	CMS4	0	0.796045	0.203955	0.132531	0.354106	3.67798	5.5574	0.436732	1.91223	-1.32558	-0.834229	-0.652701	-4.07775	0.3054	0	0.3004	0	0	0	0.0383	0	0	0	0	0	0	0	0.1381	0.0949	0	0	0	0.0604	0.2691
TCGA.CM.6677.01	female	75	t3	n0	m0	MSS	0	337	0	337	NA	NA	0	337	NA	0.659474	0.0265381	0.313988	-0.152504	1.26782	0.666649	-2.50416	2.41709	0.3776	-0.961855	0.809851	0.0959043	0.650238	0.1759	0	0.1132	0.0217	0.0069	0	0.0001	0	0	0	0.0007	0.0078	0.0144	0	0.0386	0.0059	0.0206	0.0072	0	0.0128	0.0298
TCGA.AD.6548.01	female	81	t2	n0	m0	MSI	0	650	0	650	0	650	0	650	NA	0.349493	0.341403	0.309103	0.11597	1.0472	-0.629495	0.761281	1.94775	-0.194196	1.32208	-1.53533	0.968454	-0.257911	0.2486	0.0017	0.1001	0.0165	0.0462	0	0	0	0	0	0	0	0.0067	0	0.0529	0	0.0132	0.0054	0	0.0233	0.0158
TCGA.D5.6926.01	male	65	t4	n1	m0	MSS	0	275	0	275	NA	NA	0	275	CMS4	0.596217	0.284135	0.119648	-1.40248	0.59967	-1.20455	-0.31945	0.67087	-0.336341	-0.715886	1.3283	0.919893	-2.39652	0.1534	0.0008	0.2096	0.0039	0	0	0	0	0.0042	0	0.0042	0.0165	0	0.0003	0.0344	0.0253	0.0041	0.0034	0	0.0088	0.0114
TCGA.AZ.4616.01	female	82	t3	n2	m1	MSS	1	156	1	156	NA	NA	1	156	CMS1	0.41764	0.27997	0.30239	0.00439729	1.91341	0.61354	0.104554	0.660803	-0.857608	1.79619	-1.30605	1.79598	2.2684	0.13	0.003	0.079	0.013	0.0507	0	0	0	0	0	0.0107	0.0126	0.0298	0	0.0182	0	0.0098	0	0	0.0016	0.005
TCGA.D5.6898.01	female	51	t2	n0	m0	MSS	0	229	0	229	NA	NA	0	229	CMS4	0.763217	0.136797	0.0999859	-1.69757	1.33531	-0.395566	-1.90361	2.38958	0.976264	-0.745723	1.20383	0.32928	-2.27398	0.196	0	0.0972	0.0002	0	0	0.0088	0	0	0	0.0028	0.0172	0.0117	0	0.0716	0.0168	0.0122	0.0064	0	0.0095	0.0138
TCGA.A6.2685.01	female	48	t3	n0	m0	MSS	0	1133	0	1133	NA	NA	1	948	CMS4	0.51134	0.48866	0	-2.50188	-0.115421	1.5772	1.53875	-0.157946	0.460638	-0.672933	0.208783	0.376641	0.644095	0.2904	0.0251	0.1449	0.0013	0	0	0.0034	0	0	0.0002	0	0	0	0	0.1126	0.0614	0.0104	0	0	0.0261	0.0387
TCGA.DM.A1HA.01	male	82	t3	n2	m0	MSS	0	4000	0	4000	NA	NA	0	4000	NA	0.506129	0	0.493871	1.31982	2.10594	-1.42546	-2.65029	0.259656	-1.80208	0.1135	-0.210723	-2.69494	-0.0347074	0.0379	0	0	0.0104	0.0214	0	0	0	0.0048	0	0.01	0.0323	0.0028	0	0.006	0	0.0357	0	0	0	0
TCGA.DM.A280.01	female	70	t3	n0	m0	MSS	1	236	NA	236	NA	NA	0	236	CMS3	0.407804	0.442816	0.14938	-1.01862	0.134284	1.89006	1.40855	0.657964	0.118774	1.49445	-2.80723	0.191626	2.89211	0.0325	0.0021	0.0541	0	0.0229	0	0	0	0	0	0	0	0	0	0.0173	0	0.0034	0	0	0	0.0048
TCGA.AA.3713.01	male	68	t3	n0	m1	MSI	0	579	0	579	NA	NA	0	579	CMS3	0.196805	0.274808	0.528387	1.74427	-2.91987	1.13651	0.628807	1.89295	-0.0517392	-1.2371	0.646504	0.19193	-2.54873	0.2387	0	0.0273	0.0622	0.0702	0.0044	0.0187	0	0	0	0	0.0186	0.0308	0	0.0747	0	0.047	0.004	0	0.0246	0.0068
TCGA.AA.3502.01	male	73	t2	n0	m0	MSS	0	1065	0	1065	0	1065	0	1065	CMS3	0.418495	0.0972459	0.484259	1.23089	-3.66704	-0.704576	-1.33258	0.447992	1.06261	-1.09345	0.632909	0.0267801	1.39063	0.1133	0	0	0.0416	0	0	0	0	0	0.0404	0.0025	0.0413	0.0283	0	0.0907	0	0.0379	0.0029	0	0.0074	0
TCGA.CK.5913.01	female	58	t3	n0		MSI	0	1561	0	1561	0	1561	0	1561	CMS1	0.154189	0.179593	0.666218	2.71585	-1.75288	1.45475	-0.00993559	0.48321	-0.0051518	-0.832635	0.149815	-0.531092	-0.868327	0.1578	0	0.0837	0	0.034	0.0035	0	0	0	0	0	0	0.0232	0	0.0742	0	0.0105	0.0022	0	0.0126	0.0025
TCGA.4N.A93T.01	male	67	t4	n1	m0	MSS	0	146	0	146	NA	NA	0	146	NA	0.747074	0.0472912	0.205635	-0.968906	0.956214	-0.430575	-2.56522	-0.110177	-1.97318	-0.0972014	0.989182	0.308288	1.11331	0.0296	0	0	0.0595	0.008	0	0	0	0.0552	0.0059	0.0013	0.0116	0	0	0.0059	0	0.0608	0	0	0	0
TCGA.F4.6855.01	female	70	t3	n0	m0	MSS	0	1442	0	1442	0	1442	0	1442	CMS4	0.583207	0.241295	0.175498	-1.01293	0.210652	-0.138221	-0.622607	-0.670249	0.0469192	-0.494365	1.07842	1.08026	0.184908	0.1234	0.001	0.2029	0	0	0	0	0	0	0	0.0007	0.0023	0	0	0.0417	0.0503	0.0029	0.003	0	0.0055	0.0257
TCGA.QG.A5YV.01	female	64	t4	n1		MSS	0	1301	0	1301	0	1301	0	1301	CMS2	0.716788	0	0.283212	-0.252676	0.220942	-0.452045	-3.35201	-0.919507	-1.90721	0.0582628	0.826872	0.103963	-0.27787	0.0506	0.0004	0.0177	0.0065	0.0308	0	0	0	0	0	0.0011	0	0	0	0.0281	0	0.0112	0	0	0	0
TCGA.CM.6166.01	female	48	t2	n0	m0	MSS	0	669	0	669	NA	NA	0	669	CMS2	0.682127	0.0587356	0.259137	-0.544693	1.09901	-0.491541	-2.30925	0.0255426	2.48133	3.56547	-0.236652	1.2953	0.0387176	0	0.0016	0.0563	0	0	0	0	0	0	0	0.002	0	0	0	0.0111	0.0051	0	0.0049	0	0	0.0021
TCGA.G4.6321.01	female	60	t2	n1		MSS	0	672	0	672	NA	NA	0	672	CMS3	0.204879	0.268562	0.526558	1.72408	-0.283719	2.57263	0.559108	-0.716006	0.0530425	-0.612063	-0.414687	-0.714883	0.895842	0.1842	0	0	0.1159	0.0577	0	0.0031	0	0.0055	0.0171	0.0028	0.0172	0.059	0	0.0474	0	0.0606	0	0	0.0085	0.0101
TCGA.D5.6539.01	female	45	t3	n0	m0	MSS	0	380	0	380	NA	NA	0	380	CMS3	0.500306	0.3828	0.116894	-1.3278	0.464946	0.0349985	0.700664	-1.11645	1.10566	-0.498766	-0.322344	-0.992276	-1.53426	0.1714	0	0.0292	0.0187	0.0227	0	0	0	0	0	0	0	0.0016	0	0.1175	0	0.0324	0	0	0.0242	0.0423
TCGA.CM.5344.01	female	39	t3	n1	m0	MSS	0	670	0	670	NA	NA	0	670	CMS4	0.721853	0.2399	0.038247	-2.07398	-0.19828	0.251128	-0.988146	0.0537057	-0.896495	-0.142883	0.131877	-0.807129	0.834606	0.0873	0.0017	0.1348	0	0	0	0	0	0	0	0.0062	0.0064	0	0	0.0038	0.0376	0.0027	0	0	0	0.01
TCGA.D5.6536.01	male	73	t3	n0	m0	MSS	0	543	0	543	NA	NA	1	493	CMS3	0.277759	0.542216	0.180024	-0.685351	-0.712422	-0.914157	2.52174	-1.21359	-0.567676	-1.33058	4.33615	7.18652	1.59951	0.0689	0	0.1052	0	0.0119	0	0	0	0.0041	0.0212	0	0.0076	0	0	0.0573	0	0	0	0	0.0201	0.0268
TCGA.A6.A566.01	female	55	t4	n1	m0	MSS	1	758	1	758	NA	NA	1	257	CMS4	0.127038	0.51095	0.362011	0.689342	0.330038	1.97915	2.66168	1.33599	-0.000365137	1.50299	1.09025	-1.6793	-0.489491	0.3216	0	0.2757	0.0006	0	0	0.0302	0	0	0	0	0	0	0	0.088	0.0692	0	0.0016	0	0.0378	0.1665
TCGA.D5.5541.01	male	63	t3	n1	m0	MSS	0	1701	0	1701	0	1701	0	1701	CMS2	0.577791	0.280219	0.141989	-1.23379	1.96574	-2.56613	-0.303077	0.242886	0.635573	1.51247	-1.67491	0.757238	-1.38462	0.2018	0.0007	0.0277	0.0092	0	0	0	0	0	0	0.0089	0.0212	0.017	0	0.0374	0.0026	0.0049	0.0164	0	0.0092	0.003
TCGA.AM.5821.01	female	68	t3	n0	m0	MSI	0	28	0	28	NA	NA	0	28	CMS1	0.117839	0.326106	0.556055	2.00777	-2.6128	2.0526	1.23361	2.07885	-0.257489	1.20238	1.4753	-1.13301	1.38954	0.2636	0.0006	0.0747	0.0529	0.112	0.0016	0	0	0	0	0.0053	0.0109	0.0509	0	0.0418	0	0.034	0.0242	0	0.0169	0.0254
TCGA.AD.6901.01	male	78	t3	n0		MSS	1	682	1	682	1	468	1	468	CMS4	0.376288	0.451591	0.172121	-0.834503	0.123024	-1.2065	1.55806	-1.08546	-1.06636	-0.816163	-4.37999	0.0903264	-0.0406159	0.2166	0.0901	0.1293	0	0.0169	0	0	0	0.0199	0	0.0056	0.0278	0	0	0.0387	0.0613	0.0039	0	0	0.0219	0.0266
TCGA.CM.6161.01	female	36	t2	n0	m0	MSS	0	457	0	457	NA	NA	0	457	CMS2	0.386947	0.347295	0.265758	-0.212967	-0.15164	-1.53798	0.71176	0.131756	1.90942	1.23715	-2.69907	-0.446097	-1.16743	0.1162	0.0012	0.0589	0.014	0	0.0075	0.0166	0.0015	0	0	0.0027	0.0312	0.0248	0	0.0747	0.0034	0.0188	0.0261	0	0.0153	0.0027
TCGA.CK.6748.01	female	45	t3	n1	m1	MSS	0	61	0	61	NA	NA	0	61	CMS4	0.480561	0.337169	0.182269	-0.867416	1.34665	-1.40947	0.392819	-2.2833	-2.29512	0.160768	1.40683	1.18455	0.14334	0.0985	0.0004	0.1408	0	0	0	0	0	0	0	0	0	0	0	0.0748	0.0339	0	0.0043	0	0.0095	0.0228
TCGA.D5.6540.01	male	66	t2	n0	m0	MSI	0	491	0	491	NA	NA	0	491	CMS1	0.0868399	0.19267	0.72049	3.1476	0.30809	1.33675	0.265006	0.147357	-0.107652	-0.694782	-0.105444	-1.06847	-0.386982	0.1479	0.0001	0.0854	0	0.0445	0	0	0	0	0	0.0028	0.006	0.0088	0	0.0503	0	0.0044	0	0	0.0081	0.0123
TCGA.5M.AAT6.01	female	40	t4	n2	m1	MSI	1	290	1	290	NA	NA	1	219	CMS1	0.378001	0.587093	0.0349062	-1.76215	-1.68976	3.19826	2.61779	1.3686	0.0703119	-0.772132	-0.739773	-1.24095	0.63513	0.3945	0	0.1144	0.0422	0.0163	0	0.0092	0	0	0	0.0047	0.0667	0.0521	0.0113	0.0254	0	0.0159	0	0	0.0316	0.0414
TCGA.G4.6302.01	female	90	t3	n0	m0	MSI	1	2047	0	2047	NA	NA	0	2047	CMS4	0.233266	0.652241	0.114493	-1.08432	0.827283	3.94088	3.49956	0.118062	0.193751	-0.570167	-0.943904	-1.17183	-0.337601	0.2954	0.0002	0.2299	0	0	0	0	0	0	0	0	0	0	0	0.0319	0.1502	0	0	0	0.0129	0.1174
TCGA.NH.A6GA.01	male	58	t4	n2		MSS	1	302	1	302	NA	NA	1	6	NA	0.550637	0.118489	0.330874	0.0672884	0.60503	-0.111062	-1.50371	0.685469	-1.85437	-0.162526	0.941089	-0.0885298	-1.84483	0.099	0	0	0.0113	0	0	0	0	0.0213	0	0.0016	0.0218	0.007	0	0.0209	0	0.0195	0.0095	0	0.0018	0.0039
TCGA.AA.3655.01	male	68	t3	n0	m0	MSS	0	1856	0	1856	0	1856	0	1856	CMS3	0.558101	0.149349	0.29255	-0.198602	-0.17053	-0.186138	-1.28045	-1.16401	-0.0165951	-0.301586	0.151467	-0.559222	-1.09488	0.1076	0.001	0.0469	0	0	0	0	0	0	0	0	0	0.0081	0	0.0613	0	0.005	0.0001	0	0.0142	0.0125
TCGA.A6.6652.01	male	59	t3	n0	m1	MSS	0	751	0	751	NA	NA	0	751	CMS2	0.535538	0.228363	0.2361	-0.557609	1.88698	-3.22452	-0.602245	-0.48123	1.5081	1.23786	-1.89504	0.648595	-0.775907	0	0	0	0	0.0445	0	0	0	0.0226	0	0	0.004	0	0	0.0256	0	0	0	0	0	0
TCGA.CM.5863.01	female	60	t3	n1	m0	MSS	0	457	0	457	NA	NA	0	457	CMS3	0.177806	0.590336	0.231858	-0.238359	-0.986278	-0.0496566	3.15526	-0.88435	-0.863354	1.67567	1.53817	-0.745941	1.54566	0.1392	0.0015	0.1229	0	0	0	0	0	0	0	0	0	0	0	0.064	0.0401	0.0042	0.0028	0	0.0145	0.0128
TCGA.CM.6678.01	female	63	t4	n1	m1	MSS	0	335	0	335	NA	NA	1	0	CMS3	0.291441	0.452222	0.256337	-0.183667	-0.288262	-0.753157	1.78002	-2.0636	-1.05361	1.9789	2.31808	0.443169	2.304	0.0021	0.0021	0.0307	0	0	0	0	0	0	0	0.0062	0	0	0	0.0228	0	0	0.0029	0	0	0.0169
TCGA.D5.6529.01	male	69	t3	n0	m0	MSS	0	614	0	614	NA	NA	1	386	CMS4	0.151778	0.585542	0.262679	-0.0050523	1.18423	-0.0976863	3.18418	-0.156332	-2.19617	2.11709	1.83246	-1.04709	0.78277	0.2084	0	0.17	0.0777	0	0	0.035	0	0	0	0.0002	0.0245	0.0414	0	0.0877	0.0082	0.035	0.0086	0	0.0192	0.0107
TCGA.T9.A92H.01	male	82	t3	n0	m0	MSS	0	362	0	362	1	81	1	81	CMS2	0.78489	0.0146751	0.200435	-1.04077	1.28537	-0.870174	-2.91807	-0.175506	-2.27044	0.102576	1.4497	0.740795	-0.207374	0.0284	0	0	0.0131	0.0027	0	0	0	0	0	0.001	0.0126	0	0	0.0267	0	0.0171	0	0	0	0.0001
TCGA.A6.5657.01	male	65	t3	n1	m0	MSS	0	962	0	962	0	962	0	962	CMS4	0.237015	0.546196	0.21679	-0.397622	1.18976	1.88595	2.65719	0.388098	0.536502	-0.753494	-0.0823574	-0.449694	-0.852345	0.2605	0.002	0.117	0.1987	0	0	0	0	0	0	0	0.0026	0.0116	0	0.0248	0.03	0.0347	0	0	0.0112	0.0282
TCGA.D5.6930.01	male	67	t3	n0	m0	MSI	0	406	0	406	NA	NA	0	406	CMS1	0.0984661	0.397854	0.50368	1.67317	1.31196	2.1898	1.8466	0.526886	0.0153765	-0.916749	0.949674	1.19143	1.38221	0.272	0	0.1278	0.1251	0.0204	0	0	0	0	0	0.0001	0.0237	0.0568	0	0.0525	0.0016	0.0425	0.0018	0	0.0082	0.025
TCGA.QL.A97D.01	female	84	t2	n0		MSS	0	666	0	666	0	666	0	666	NA	0.520402	0.212299	0.2673	-0.332338	-0.894082	0.174084	-0.689689	-0.816609	0.0849485	1.60428	1.02622	-1.3871	-0.0146178	0.1582	0	0	0.0907	0	0.0061	0.0023	0	0.0254	0	0.0055	0.0585	0.0378	0.0001	0.052	0	0.0414	0.0019	0	0.0066	0.0115
TCGA.D5.7000.01	female	79	t2	n0	m0	MSS	0	312	0	312	NA	NA	0	312	CMS1	0.271103	0.243258	0.485638	1.38353	-1.02154	0.0890004	0.191021	0.317158	0.202007	1.39928	2.3849	0.275663	-1.57016	0.0924	0	0.07	0.002	0	0	0.0027	0	0	0	0	0.0058	0.0067	0	0.0541	0	0.0131	0.0102	0	0.0095	0.0171
TCGA.D5.5537.01	male	83	t3	n2		MSS	1	1381	1	1381	1	722	1	722	CMS2	0.449747	0.214498	0.335755	0.198338	-0.565378	-0.604616	-0.491721	-1.14182	-3.27556	1.92178	-1.06228	2.50868	0.640308	0.0258	0.0039	0.1102	0	0.0216	0	0	0	0.0112	0	0.0043	0.0026	0	0	0.0209	0.0146	0.0078	0	0	0	0
TCGA.CM.5860.01	male	44	t3	n0	m0	MSS	0	974	0	974	NA	NA	0	974	CMS4	0.32319	0.312135	0.364675	0.51657	-1.94812	0.041892	0.598702	-1.35377	2.25957	1.16127	1.26397	-0.608511	0.882548	0.1686	0.0053	0.1524	0	0	0.0004	0	0	0	0	0.0046	0	0	0	0.0351	0.0015	0	0.0163	0	0.0066	0.0144
TCGA.CK.4950.01	female	68	t3	n1	m0	MSS	0	2599	0	2599	0	2599	0	2599	CMS3	0.345066	0.285822	0.369113	0.525243	-0.138959	0.93075	0.336119	-0.38204	0.203703	3.87413	-1.53418	-0.612724	0.851513	0.1978	0	0.0665	0.0499	0.0431	0	0	0	0	0	0	0	0.0141	0	0.0808	0	0.0222	0.0029	0	0.02	0.015
TCGA.SS.A7HO.01	female	44	t4	n0	m0	MSS	0	1829	0	1829	1	506	1	506	CMS2	0.761087	0.0231836	0.215729	-0.914413	-1.19274	-1.93825	-2.79038	2.26476	-2.10334	0.959068	-0.679688	2.57712	-2.09237	0.0457	0	0	0	0	0	0.003	0	0.0004	0	0.0003	0.032	0	0	0.0149	0	0	0	0	0	0.0238
TCGA.D5.6537.01	male	64	t3	n1		MSS	1	146	1	146	NA	NA	1	123	CMS2	0.499439	0.232108	0.268453	-0.304167	-0.697994	-2.20461	-0.480514	-0.0304276	1.39913	3.65221	-1.2685	-1.03991	0.400343	0.0221	0	0	0	0.0511	0	0	0	0	0	0.0044	0	0.0056	0	0.0293	0	0.0034	0.0015	0	0	0
TCGA.CA.5254.01	female	42	t3	n0	m0	MSS	0	386	0	386	0	386	0	386	CMS3	0.323199	0.0934431	0.583358	1.99232	-2.28242	1.5538	-1.11872	-1.61529	0.0706926	1.5798	1.72444	0.210342	-0.401831	0.0967	0	0.0293	0.0276	0	0	0	0	0.0049	0.0041	0.0007	0.0099	0.0154	0	0.0015	0.0185	0.0072	0.0077	0	0.0012	0
TCGA.AD.A5EK.01	male	51	t2	n0		MSS	0	500	0	500	0	500	0	500	CMS2	0.252526	0.322579	0.424896	0.991682	1.25338	-3.23743	0.861443	-2.41015	0.352618	-0.733682	-3.62498	0.748457	0.216321	0.0273	0.0023	0	0	0	0	0	0	0.0019	0	0.0001	0	0	0	0.0049	0	0.0015	0.0062	0	0	0.0041
TCGA.CK.6746.01	female	84	t4	n0		MSI	0	0	0	0	NA	NA	0	0	CMS1	0.0271551	0.144829	0.828016	3.93127	-1.48514	0.464185	0.0419527	1.84032	-0.0134584	-1.22697	0.557512	-0.474802	-0.23491	0.2843	0	0	0.0279	0.1018	0.0011	0.0073	0	0	0	0.0039	0.0786	0.0993	0.0054	0.0542	0	0.022	0.0012	0	0.0255	0.0017
TCGA.CA.6718.01	male	46	t3	n0	m0	MSS	1	306	1	306	1	207	1	207	CMS1	0.0223575	0.388122	0.589521	2.32647	2.32193	2.10234	1.96482	0.140039	-0.129596	1.265	-1.95058	1.64729	-2.06625	0.3314	0	0.0985	0.0781	0.0653	0.0063	0.0024	0	0	0	0	0.0262	0.0765	0.0068	0.0449	0	0.0254	0.0056	0	0.0142	0.015
TCGA.AY.5543.01	female	65	t3	n1	m1	MSS	0	1004	0	1004	NA	NA	0	1004	CMS2	0.668746	0.20916	0.122094	-1.45651	-0.379902	1.10455	-1.09373	-0.688817	-0.853901	-0.36063	0.45163	0.456059	1.32941	0.195	0	0	0.0513	0	0.0061	0	0	0	0	0.0024	0.0142	0.0069	0	0.0439	0	0.0252	0.0098	0	0.0095	0.0043
TCGA.F4.6807.01	female	51	t3	n2	m0	MSS	0	1309	0	1309	0	1309	0	1309	CMS4	0.440987	0.377452	0.18156	-0.833717	1.77338	0.662327	0.810378	0.702009	-0.387133	-2.79487	-0.622995	0.687372	-0.735575	0.3034	0.0066	0.1654	0.0248	0	0	0.007	0	0	0	0.0057	0.0428	0.0455	0	0.0705	0.074	0.0167	0.009	0	0.0265	0.0374
TCGA.CK.5915.01	male	63	t2	n0		MSS	0	0	0	0	NA	NA	0	0	CMS2	0.672045	0	0.327955	0.645112	2.37317	-0.470056	-4.90501	-0.788204	-0.0734329	4.66718	-0.276355	0.350591	-3.68531	0.0036	0	0	0	0.0164	0.0009	0	0	0	0	0.0051	0	0.001	0	0.0494	0	0.0061	0.0059	0	0	0.0036
TCGA.A6.3810.01	male	62	t3	n0	m0		0	1111	0	1111	0	1111	0	1111	NA	0.455978	0.488121	0.0559016	-1.69629	-0.808012	-0.959789	1.64113	-1.31285	-0.732661	-0.738333	-3.92859	1.00071	0.915005	0.0958	0	0.0596	0.0504	0	0.0206	0.009	0.0182	0	0	0.0039	0.0597	0.0225	0	0.0414	0.0113	0.0223	0.0055	0.0128	0.0041	0.0003
TCGA.A6.6781.01	male	43	t4	n1			0	598	0	598	0	598	0	598	CMS4	0.218103	0.540395	0.241502	-0.21246	2.01787	2.44321	2.66001	-0.00952204	0.253405	-0.758026	0.63459	1.04203	0.447326	0.1914	0	0.2529	0.0194	0	0.0012	0.012	0	0	0	0.0033	0.0262	0.0217	0	0.0914	0.0565	0.0186	0	0	0.0118	0.0299
TCGA.NH.A50U.01	male	42	t4	n0	m1	MSS	1	334	1	334	NA	NA	1	276	NA	0.692852	0	0.307148	-0.163778	-2.60019	0.172242	-3.00123	0.794574	-2.42045	1.80803	2.41232	0.135052	-0.227665	0.0742	0	0.0565	0.0041	0	0	0	0	0.0112	0.0034	0.0011	0.0026	0	0	0.0004	0.0019	0.0152	0.0022	0	0	0.0085
TCGA.AU.3779.01	female	80	t3	n0	m0	MSS	0	441	0	441	NA	NA	0	441	CMS2	0.577349	0.367595	0.0550558	-1.82003	0.296059	-0.389136	0.384223	-1.44472	-2.91689	-0.84995	-0.496292	-0.54411	1.00713	0.1886	0.0007	0.0386	0.0361	0	0	0.0266	0	0	0.024	0	0.0407	0.028	0	0.0823	0	0.0162	0	0	0.0114	0.007
TCGA.DM.A1D4.01	male	80	t3	n0	m0	MSS	1	2821	NA	2821	NA	NA	1	1920	CMS3	0.477869	0.0525689	0.469562	1.07398	1.18471	-1.01417	-1.83528	-0.882866	-0.0759161	-0.182881	-0.205721	-1.83864	1.96235	0.0121	0	0	0.0105	0	0	0	0	0.0211	0.0336	0.0032	0.0173	0.0081	0	0.0134	0	0.0243	0	0	0	0.0005
TCGA.G4.6304.01	female	66	t4	n0	m0	MSI	0	1631	0	1631	NA	NA	1	859	NA	0.261783	0.542093	0.196124	-0.561165	1.56624	2.28641	2.56163	0.993104	0.004247	-0.838679	0.769826	0.957664	2.70859	0.1338	0	0	0.0085	0.0707	0	0	0	0	0	0.0014	0	0	0	0.0177	0	0.0228	0	0	0.0065	0
TCGA.CA.6717.01	male	57	t3	n0	m0	MSS	0	388	0	388	0	388	0	388	CMS4	0.193939	0.502608	0.303453	0.229109	2.22239	1.94624	2.42507	0.338025	0.0117677	-0.691785	0.73258	0.77653	-0.602047	0.4453	0.0029	0.1085	0.0975	0	0.002	0	0	0	0	0.0015	0.02	0.0357	0	0.1184	0.0689	0.0383	0.013	0	0.0405	0.0431
TCGA.DM.A1D0.01	female	79	t3	n0	m0	MSS	0	3974	0	3974	NA	NA	0	3974	CMS2	0.489754	0.370118	0.140129	-1.16074	-0.182305	-2.69716	0.628058	-1.88081	-0.647887	-0.28711	-0.164219	-1.50639	1.68263	0	0	0	0	0	0	0	0	0	0	0.0002	0	0	0	0.0115	0	0.0078	0	0	0	0.0024
TCGA.CM.6675.01	male	35	t3	n2	m1	MSS	0	397	0	397	NA	NA	1	337	CMS1	0.181781	0	0.818219	3.82732	-3.76734	-0.575712	-1.83059	1.06883	0.0817271	-1.63282	0.993218	0.728881	-3.18733	0.0561	0.0017	0.0558	0.0019	0	0	0	0	0.0001	0	0.0023	0.0014	0.0005	0	0.028	0	0.0128	0	0	0.0011	0
TCGA.G4.6307.01	female	37	t3	n1	m0	MSS	0	1674	0	1674	NA	NA	0	1674	CMS2	0.799116	0.120785	0.0800989	-1.86669	1.31674	-1.34446	-2.12117	1.1388	2.68558	-0.643231	-0.0596928	-1.73893	1.24324	0.0363	0	0	0.0281	0.05	0	0	0	0.0085	0	0.0036	0	0	0	0.0066	0	0.0383	0	0	0	0
TCGA.AZ.5403.01	male	43	t3	n0		MSS	1	1910	1	1910	NA	NA	1	304	CMS2	0.766665	0.233335	0	-2.78565	1.23398	1.66173	-1.11602	1.69345	1.09703	-0.770079	0.0907211	-0.362271	1.22084	0.0422	0.0048	0.1089	0	0	0	0	0	0	0	0.0048	0	0	0	0.0536	0.0074	0	0.01	0	0.0053	0.0306
TCGA.CM.5861.01	female	63	t3	n0	m0	MSI	0	457	0	457	NA	NA	1	335	CMS1	0.138551	0.192556	0.668893	2.74912	-1.6067	1.68517	0.131857	-0.184701	0.513431	-1.38141	2.05845	3.50014	1.07174	0.0335	0	0.0111	0	0.0042	0	0	0	0	0	0.0026	0.0047	0.0235	0	0.028	0	0.0135	0	0	0	0.006
TCGA.CA.5796.01	female	52	t3	n0	m0	MSS	0	377	0	377	0	377	0	377	CMS3	0.0316253	0.542142	0.426233	1.21552	-2.60038	-2.33197	3.15065	-3.08692	-1.43284	-0.738648	-0.192652	-0.770784	0.285038	0.1143	0	0	0.0354	0	0.0081	0.0013	0	0	0.0254	0	0.0001	0.0239	0	0.089	0	0.0488	0	0	0.0111	0.0172
TCGA.AZ.4323.01	male	37	t4	n2	m1	MSI	1	43	1	43	NA	NA	1	43	CMS4	0	1	0	-1.63012	1.01954	1.39814	6.82712	0.408763	-0.323958	-0.702185	0.135015	-0.204948	-0.721699	0.3838	0.0031	0.1691	0.5628	0	0	0.1223	0	0	0	0.01	0.1677	0.1462	0	0.0279	0.0376	0.0751	0	0	0.0191	0.031
TCGA.D5.6928.01	male	80	t3	n0	m0	MSI	0	354	0	354	NA	NA	0	354	CMS1	0.0681276	0.652333	0.27954	0.190076	0.0947349	2.62128	3.92263	2.01591	0.0513248	1.2126	1.83449	-0.154415	-1.87493	0.4984	0	0.141	0.3823	0.0653	0	0.1133	0	0	0	0.005	0.2504	0.2734	0.1006	0.1466	0.0345	0.0901	0	0	0.0436	0.0183
TCGA.A6.5664.01	male	80	t4	n2		MSI	0	672	0	672	NA	NA	1	183	CMS4	0.311903	0.509554	0.178543	-0.728554	1.15697	1.97669	2.17792	0.00370415	-0.107099	1.69502	1.66209	-0.206752	-0.466582	0.3049	0.0015	0.1323	0	0	0	0	0	0	0	0	0.0148	0.0259	0	0.1111	0.0874	0	0.0006	0	0.0309	0.0659
TCGA.AZ.5407.01	female	51	t1	n0	m0	MSS	0	2683	0	2683	0	2683	0	2683	CMS3	0.380453	0.153669	0.465878	1.14385	-1.03549	0.286735	-0.792189	-0.68896	0.676082	-0.641496	-0.261045	-1.12272	1.72019	0.0962	0	0	0.0365	0	0.0097	0	0	0	0.0223	0.0066	0.0385	0.0463	0	0.0811	0	0.0364	0.0055	0	0.0055	0.0051
TCGA.AY.6196.01	male	47	t3	n2		MSS	0	6	0	6	NA	NA	0	6	CMS4	0.165992	0.745584	0.0884245	-1.19482	-0.1186	1.72574	4.40466	0.0973761	-1.4606	-0.594277	-4.73135	-0.262371	-1.20308	0.432	0.2903	0.2408	0.1937	0.0097	0	0.1115	0	0	0	0.0008	0.1149	0.1294	0	0.1797	0.1082	0.0778	0	0	0.0504	0.1011
TCGA.D5.6920.01	female	77	t3	n0	m0	MSS	0	377	0	377	NA	NA	0	377	CMS3	0.417629	0.318612	0.263759	-0.256293	0.743902	0.496742	0.408042	-0.248312	-0.00775849	-0.649472	1.27232	1.48061	-1.21545	0.1566	0	0.0404	0.0407	0.0467	0	0	0	0	0	0	0	0	0	0.0588	0	0.0294	0	0	0.0132	0.0164
TCGA.G4.6297.01	female	55	t3	n2	m1	MSS	0	2506	0	2506	NA	NA	1	439	CMS4	0.586624	0.314479	0.0988971	-1.53319	-0.36995	0.436012	-0.0566252	0.00660035	-0.363593	-0.350221	0.0986742	-0.666352	-2.06044	0.1875	0.0032	0.1694	0	0	0	0.0033	0	0	0	0.0008	0.0246	0.0132	0	0.0559	0.0057	0.0092	0.001	0	0.0102	0.0303
TCGA.A6.2686.01	female	81	t3	n0	m0	MSI	1	1126	0	1126	0	1126	0	1126	CMS1	0.0759776	0.305552	0.618471	2.46969	-0.736122	0.32826	1.17926	1.20454	0.923886	3.23662	-0.818017	0.0634736	1.78694	0.5125	0.0026	0.0573	0.0698	0.1416	0	0	0	0	0	0.0138	0.066	0.0969	0.0008	0.139	0.001	0.0336	0.021	0	0.0883	0.007
TCGA.DM.A28F.01	male	73	t3	n1	m0	MSS	1	1094	NA	1094	NA	NA	0	1094	CMS2	0.680658	0.0990167	0.220325	-0.805186	-0.0623253	-1.30792	-1.98916	1.70354	2.90317	-1.06646	0.361812	-0.908265	-0.351657	0.0647	0	0	0.0287	0.0023	0	0	0	0.0179	0.0053	0.0035	0.0222	0	0	0.0015	0	0.0254	0	0	0	0
TCGA.CA.5256.01	female	54	t3	n0	m0	MSS	0	379	0	379	0	379	0	379	CMS2	0.466265	0.302964	0.230771	-0.526201	-0.528847	-2.45191	0.160766	-0.0726314	-1.65138	-2.573	-0.801681	-0.53873	3.22217	0.1294	0.0036	0.0267	0	0.0418	0.0019	0	0	0	0	0.0098	0.0134	0.0318	0	0.0801	0.0006	0.0041	0.0153	0	0.0029	0
TCGA.G4.6306.01	male	71	t2	n0	m0	MSS	0	1359	0	1359	NA	NA	0	1359	CMS2	0.460666	0.2389	0.300434	-0.050643	0.286841	-2.17377	-0.32801	-0.536019	1.46343	1.49863	2.00815	-0.715129	1.22572	0.0404	0	0	0.0091	0.0543	0	0	0	0.0138	0.0092	0.0046	0.0073	0.0024	0	0.0211	0	0.0173	0	0	0	0
TCGA.D5.6922.01	male	76	t3	n1	m0	MSS	0	308	0	308	NA	NA	0	308	CMS4	0.644278	0.304553	0.0511685	-1.91135	-1.08893	-2.11984	-0.282025	1.43305	0.192752	-1.02136	1.32432	0.692564	-4.09319	0.1567	0.0026	0.1281	0	0.0008	0	0	0	0.0148	0	0	0.0166	0	0	0.0113	0.0235	0.0062	0	0	0.0065	0.0132
TCGA.CK.5916.01	female	71	t1	n0	m0	MSI	1	643	1	643	NA	NA	1	292	CMS1	0.0284677	0.312831	0.658702	2.78739	0.996178	1.93544	1.35792	0.271468	-0.0690888	-0.934615	0.841065	0.917114	-1.09635	0.281	0	0.0727	0.0453	0.0642	0.0185	0	0.0057	0	0	0.0029	0.0141	0.0642	0	0.0594	0.0201	0.0261	0.012	0	0.0205	0.005
TCGA.DM.A288.01	male	68	t3	n2	m0	MSS	1	427	NA	427	NA	NA	1	320	NA	0.310557	0.256997	0.432446	0.986202	-1.67524	-1.78447	0.198009	-1.97226	-0.66878	1.40758	-2.13897	0.996184	1.03991	0.0154	0	0	0.0082	0.0038	0	0	0	0.012	0	0.0021	0.0037	0	0	0.0001	0	0.024	0.006	0	0	0.0006
TCGA.DM.A1HB.01		75					0	4126	0	4126	NA	NA	0	4126	CMS1	0.160583	0.155499	0.683919	2.82909	-0.844474	1.41894	-0.215501	0.0601376	0.0742434	-0.878136	0.612355	0.407532	1.70759	0.0197	0	0.0126	0	0.0348	0	0	0	0	0	0.0036	0	0	0	0.0278	0	0.0064	0.0085	0	0.0004	0.0063
TCGA.CM.6170.01	female	73	t2	n0	m0	MSS	0	457	0	457	NA	NA	0	457	CMS2	0.835595	0.13897	0.0254342	-2.27106	1.46763	-0.417029	-2.07165	0.396943	-2.15339	-2.26095	-0.542199	0.350803	-1.29156	0.1466	0.0004	0.0386	0.026	0	0	0.0155	0	0	0	0	0.0205	0	0	0.0483	0.0078	0.0151	0.0035	0	0.0045	0.0004
TCGA.CK.4948.01	female	45	t3	n1	m0	MSS	0	4502	0	4502	0	4502	0	4502	CMS4	0.727444	0.235628	0.0369281	-2.08832	-1.48588	0.966123	-1.036	3.34023	1.14979	1.34109	1.67716	-1.27377	0.21464	0.0882	0.0021	0.1261	0	0.0049	0	0	0	0	0.0017	0.0012	0.0054	0	0	0.0423	0.0236	0.0071	0.0034	0	0.0156	0.0177
TCGA.CM.6165.01	male	74	t3	n0	m0	MSS	0	488	0	488	NA	NA	0	488	CMS2	0.521053	0.253091	0.225856	-0.612648	1.41412	-0.373567	-0.371012	-1.08384	0.133538	-0.254731	-0.07954	-1.05005	-1.69976	0.198	0	0.0627	0	0	0.0017	0	0	0	0	0.0013	0.003	0.0103	0	0.0444	0.0398	0.0098	0.0108	0	0.0081	0.0236
TCGA.F4.6856.01	male	45	t2	n0	m0	MSI	0	1074	0	1074	0	1074	0	1074	CMS3	0.30166	0.313806	0.384534	0.671524	-0.531831	2.00352	0.666888	-0.429569	0.0853504	-0.900541	1.17979	2.04608	-0.179684	0.0476	0	0.0363	0.0109	0.0056	0	0	0	0	0	0.0005	0.0182	0.0146	0	0.0601	0	0.0158	0.0018	0	0.0073	0.0086
TCGA.F4.6569.01	male	60	t2	n0	m0	MSS	0	1087	0	1087	0	1087	0	1087	CMS4	0.30219	0.502617	0.195194	-0.60674	1.80053	1.24792	2.14828	0.244398	0.377912	-0.636116	0.134815	-0.339078	-0.490668	0.2894	0.0006	0.2201	0	0	0	0.0001	0	0	0	0	0	0.0187	0	0.0614	0.1232	0.0035	0.0008	0	0.022	0.0722
TCGA.D5.6535.01	female	80	t3	n1		MSS	0	460	0	460	NA	NA	0	460	CMS3	0.536654	0.234096	0.22925	-0.60492	0.770207	-0.120829	-0.560074	-0.136204	-0.507816	-0.475476	0.00664542	-0.907242	-1.35548	0.1851	0	0.0294	0.0278	0	0.004	0	0	0.0035	0	0	0.0222	0.0142	0	0.0556	0	0.0231	0.0045	0	0.0163	0.0147
TCGA.AD.6895.01	male	84	t3	n1	m0	MSI	0	763	0	763	0	763	0	763	CMS1	0.117066	0.331868	0.551066	1.97486	1.47534	1.61798	1.28083	0.326644	-0.118286	-0.793886	0.953874	0.929112	0.263195	0.2331	0	0.083	0.006	0.0412	0	0	0	0	0	0.006	0.0354	0.0374	0.0063	0.0335	0.0034	0.0172	0	0	0.0089	0.0158
TCGA.NH.A8F8.01	male	79	t4	n2	m1	MSS	1	511	1	511	NA	NA	1	511	CMS2	0.696666	0.126314	0.17702	-1.11299	-0.678495	1.27104	-1.81573	-0.0984556	-1.90075	-0.438703	-0.00826541	-0.343298	0.114773	0.1424	0.0018	0.0914	0.0099	0.0042	0	0.0061	0	0.0208	0	0	0.0148	0	0	0.0282	0.0239	0.0104	0.0058	0	0.0019	0.0075
TCGA.D5.6929.01	female	49	t3	n1	m1	MSS	0	408	0	408	NA	NA	0	408	CMS2	0.78919	0.161451	0.0493588	-2.06448	1.41503	0.836264	-1.77643	3.1816	0.298897	0.376369	-1.63178	2.21859	0.983127	0.157	0.0002	0.1262	0.06	0.0069	0	0.0001	0	0	0	0.0047	0.0242	0.0168	0	0.0045	0	0	0	0	0.0041	0.0074
TCGA.A6.5667.01	female	40	t3	n1		MSS	0	887	0	887	0	887	0	887	CMS2	0.700114	0.200732	0.0991539	-1.64182	1.54921	-1.88579	-1.24014	-0.452074	-0.0769047	1.88239	-2.37509	-0.172049	-1.36897	0.1014	0.0027	0.0523	0	0	0	0	0	0	0	0.002	0	0.0032	0	0.0258	0.0067	0	0.0076	0	0.0003	0.0037
TCGA.CM.6169.01	male	67	t3	n0	m0	MSS	0	396	0	396	NA	NA	0	396	CMS4	0.546962	0.294094	0.158945	-1.08939	-1.23321	-0.0926185	-0.115271	1.2338	-0.899233	1.69471	2.42607	0.00358501	-2.03081	0.2422	0	0.1344	0	0	0.0013	0.0154	0	0	0	0.003	0.0306	0.0295	0	0.1907	0.0338	0	0.0115	0	0.0336	0.0564
TCGA.CM.6680.01	female	78	t3	n2	m0	MSI	0	366	0	366	NA	NA	0	366	CMS3	0.479003	0.223885	0.297113	-0.09089	-1.31118	1.02709	-0.492822	-0.863018	0.0889631	-0.657795	0.585473	0.792249	-1.20307	0.1324	0.0003	0.0997	0.0086	0	0	0.0136	0	0.0113	0.0437	0	0.0039	0.0045	0	0.0796	0.009	0.0274	0	0	0.0097	0.0089
TCGA.AA.3663.01	male	42	t3	n0	m0	MSI	0	212	0	212	0	212	0	212	CMS3	0.0882069	0.214537	0.697256	2.98948	0.8518	0.57663	0.433235	0.688455	0.236305	-0.904402	0.493959	-0.337107	2.08077	0.1259	0	0	0	0.0242	0	0	0	0	0	0	0	0	0	0.1187	0	0.0017	0.0121	0	0.0082	0.0061
TCGA.A6.6648.01	male	56	t3	n0	m1	MSS	0	766	0	766	NA	NA	1	686	CMS2	0.867283	0.0618038	0.0709135	-1.99496	1.95906	-0.742444	-2.75869	0.714732	1.13277	-0.196863	0.734821	-0.450337	-3.33945	0.0925	0	0	0.0034	0.0382	0.0016	0	0	0	0	0.0057	0	0	0	0.0196	0	0.0061	0.0137	0	0.0002	0.0093
TCGA.RU.A8FL.01	male	51	t3	n2		MSS	0	1177	0	1177	NA	NA	1	256	CMS2	0.343292	0.362432	0.294276	0.02194	-0.537134	-3.57138	0.94228	0.354102	-0.469227	-1.32932	-2.59421	2.04098	1.52844	0	0	0	0.0032	0	0	0	0	0.0158	0	0	0.008	0	0	0.011	0	0.0204	0	0	0	0
TCGA.CA.6719.01	male	77	t3	n0	m0	MSS	0	435	0	435	NA	NA	1	354	CMS4	0.434503	0.294248	0.271249	-0.222152	0.576914	-2.08585	0.173552	0.385145	1.22852	-0.871524	0.339804	-0.957407	-1.36342	0.1572	0.0015	0.1027	0	0	0	0.005	0	0	0	0.0063	0.0113	0.0028	0	0.0401	0.0142	0.0054	0.0062	0	0.0099	0.0215
TCGA.A6.6649.01	male	66	t3	n1	m0	MSI	0	735	0	735	0	735	0	735	CMS1	0.0964511	0.446582	0.456967	1.35989	0.0550558	0.38063	2.23441	-2.18085	-1.16704	1.78555	-2.80488	0.247596	-1.98044	0.1917	0.002	0.1042	0.0072	0	0	0.0103	0	0.0045	0	0	0.002	0.0012	0	0.1007	0.0084	0.0154	0.0035	0	0.0099	0.0431
TCGA.NH.A6GB.01	female	71	t3	n2		MSS	0	476	0	476	NA	NA	0	476	NA	0.382371	0.33257	0.28506	-0.0782588	-2.3753	-1.64698	0.607826	2.05942	1.14113	0.935413	2.43629	-0.25229	0.386165	0.0968	0	0.0026	0.0198	0.0486	0	0.0017	0	0.008	0	0.0028	0.024	0.0013	0	0.0374	0	0.0121	0	0	0.0046	0.008
TCGA.AZ.4614.01	female	71	t4	n1	m1	MSS	1	172	1	172	NA	NA	1	172	CMS1	0.374287	0.0327228	0.59299	2.00765	-2.80238	0.00769881	-1.72622	0.0153621	0.198056	-0.786393	0.210713	-0.642129	0.301194	0.032	0.0014	0	0	0.0068	0	0	0	0	0	0.0064	0.0206	0.0115	0	0.003	0	0.0174	0.0012	0	0	0
TCGA.A6.3809.01	female	71	t4	n0	m0		0	996	0	996	NA	NA	0	996	NA	0.138346	0.294091	0.567563	2.06549	-1.68295	1.33709	0.929748	1.69961	0.00721071	1.15318	2.07955	-0.20525	2.86662	0.3461	0	0.0109	0.0902	0.0503	0.0589	0	0.0189	0	0	0.0208	0.0498	0.066	0	0.0951	0	0.0294	0.0332	0.0046	0.0383	0.0026
TCGA.CM.5864.01	male	60	t2	n0	m0	MSS	0	457	0	457	NA	NA	0	457	NA	0.331117	0.362172	0.306712	0.117701	-1.15348	-3.99029	0.971374	-0.474869	0.183023	-0.843178	0.408383	-1.1768	1.99341	0.078	0	0	0.0013	0.0283	0.0017	0	0	0	0	0.0047	0.0079	0.0082	0	0.0308	0	0.0117	0.0211	0	0.0012	0.0129
TCGA.D5.6927.01	male	34	t3	n0	m0	MSI	0	287	0	287	NA	NA	0	287	CMS1	0.358959	0.430322	0.210719	-0.557176	-0.291456	2.25252	1.43536	-0.0566962	0.031931	-0.810019	0.89625	1.57665	-0.590549	0.1957	0	0.1449	0.0175	0.0287	0	0.0009	0	0	0	0.0026	0.0336	0.025	0.0046	0.0529	0	0.0103	0.0079	0	0.0129	0.0139
TCGA.QG.A5YW.01	female	55	t3	n2		MSS	0	896	0	896	0	896	0	896	NA	0.632014	0.153278	0.214708	-0.795788	-0.023085	-0.303473	-1.43863	2.46204	2.47878	0.958909	-2.34813	-0.00143273	0.981724	0.1943	0	0.0379	0.0458	0	0	0.0028	0	0.0111	0.0044	0	0.005	0.0081	0	0.0366	0	0.0307	0	0	0.0111	0.0114
TCGA.D5.6538.01	female	79	t3	n2	m0	MSS	0	521	0	521	NA	NA	0	521	CMS2	0.405918	0.0206634	0.573419	1.84481	-2.89675	-1.4969	-1.90182	-1.94034	2.43862	0.843684	-2.69267	0.61005	-0.294677	0	0	0	0	0.0011	0	0	0	0.0086	0	0.0029	0.0059	0	0	0.0054	0	0	0.0045	0	0	0.0063
TCGA.CM.6172.01	female	70	t3	n1	m0	MSS	0	335	0	335	NA	NA	0	335	CMS3	0.374443	0.294871	0.330686	0.237355	1.12773	-1.13398	0.332048	-2.75122	-2.04746	-0.736154	0.375829	0.674775	-1.99994	0.0694	0	0.0491	0.0115	0	0	0	0	0	0	0	0.0116	0.0012	0	0.0634	0.0064	0	0.0071	0	0.0029	0.0194
TCGA.D5.6533.01	female	68	t4	n0	m0	MSS	0	775	0	775	0	775	0	775	CMS2	0.921405	0	0.0785945	-1.87333	2.36205	0.898765	-3.75205	1.24126	-0.665403	-2.3012	-1.11252	-0.542269	-1.55879	0.1662	0	0	0.0132	0.0035	0	0.0006	0	0.0085	0	0	0.0118	0.0002	0	0.0201	0	0.0126	0	0	0.0057	0.0272
TCGA.DM.A28H.01	male	50	t3	n2	m0	MSS	0	3561	0	3561	NA	NA	1	484	NA	0.439352	0.118769	0.441879	0.924615	1.12406	-1.26963	-1.2169	-0.0955602	-0.0697975	-0.481258	0.503501	-0.751938	0.465396	0.0649	0	0	0	0.0063	0	0	0	0	0	0.0128	0.0171	0.0013	0	0	0	0.0105	0.0214	0	0	0.0007
TCGA.F4.6460.01	female	51	t3	n1	m0	MSS	1	972	1	972	1	313	1	313	CMS4	0.546349	0.372382	0.0812696	-1.61298	3.81122	-1.64425	0.501094	0.608444	0.164683	-2.8204	-0.749659	-0.132601	-0.11204	0.1703	0.0023	0.1328	0.0023	0.0047	0	0.0133	0	0.0184	0.0084	0	0.0027	0	0	0.0442	0.0128	0.004	0	0	0.0089	0.0236
TCGA.D5.5540.01	male	73	t3	n0	m0	MSS	0	1706	0	1706	0	1706	0	1706	NA	0.61802	0.0295184	0.352461	0.147439	3.00573	-1.06859	-2.37474	-1.05904	-1.34575	-0.243798	2.98917	3.69807	2.24894	0.0716	0.0005	0.0259	0	0	0.0082	0	0	0	0	0.0131	0.0467	0.0352	0	0.0256	0	0	0.0443	0	0.0027	0
TCGA.F4.6463.01	male	51	t3	n0	m0	MSS	0	1087	0	1087	0	1087	0	1087	CMS4	0.452153	0.379263	0.168584	-0.932145	-0.0381484	0.818572	0.796042	-0.208939	0.0717563	1.56268	1.46191	-0.62022	-0.337174	0.0789	0.004	0.1694	0	0	0	0	0	0	0	0.0049	0.0022	0	0	0.0419	0.0392	0	0	0	0	0.0416
TCGA.AZ.6600.01	male	64	t4	n1	m1	MSS	1	368	1	368	NA	NA	1	368	CMS4	0.462442	0.25311	0.284448	-0.160253	1.05076	0.519934	-0.22096	-0.520913	-0.264157	-0.446003	0.114981	-0.489098	0.240366	0.197	0	0.1033	0.042	0	0	0	0	0.0001	0.0001	0	0	0.0003	0	0.0306	0.0314	0.0201	0.0058	0	0.0093	0.0382
TCGA.D5.6530.01	male	53	t2	n0	m0	MSI	0	621	0	621	NA	NA	0	621	CMS3	0.384676	0.274913	0.34041	0.29303	-0.641541	1.14426	0.149145	0.00130639	0.0349845	-0.69098	0.175421	-0.217172	0.473491	0.2727	0	0.0081	0.0528	0.0194	0	0.0051	0	0	0.0252	0	0.0125	0.0297	0	0.0588	0	0.0363	0	0	0.0118	0
TCGA.G4.6303.01	female	54	t3	n1	m1	MSS	1	2003	1	2003	NA	NA	1	872	CMS2	0.767982	0.0281344	0.203884	-1.00106	1.59652	-1.05811	-2.76913	0.139555	2.4852	-2.95882	-1.05086	-0.164846	-3.06971	0.0792	0.0009	0.0558	0	0	0	0.0011	0	0.0055	0	0.0042	0.0261	0.0051	0	0.0615	0	0.0032	0.0036	0	0.0035	0.0132
TCGA.AZ.4682.01	male	61	t3	n0	m1	MSS	1	680	1	680	NA	NA	1	680	CMS2	0.713667	0.178861	0.107472	-1.59887	-0.703215	-1.64305	-1.44656	-0.485572	0.76664	-0.578963	0.244387	-0.695518	2.19079	0.0263	0.0017	0.0279	0	0	0	0	0	0	0	0.0091	0	0	0	0.0393	0	0	0.0056	0	0	0.0088
TCGA.G4.6586.01	female	73	t3	n0	m0	MSI	0	1089	0	1089	NA	NA	0	1089	CMS1	0.1437	0.186266	0.670033	2.7518	-0.376969	1.51966	0.0692963	0.234241	-0.077117	-0.865007	-0.00187422	-0.621533	1.05937	0.1679	0	0	0.022	0.1209	0	0	0	0	0	0.0074	0.0411	0.0675	0.0165	0	0	0.0315	0	0	0.0029	0.0032
TCGA.AD.6890.01	male	65	t1	n0		MSS	0	746	0	746	0	746	0	746	CMS2	0.55762	0.255568	0.186813	-0.911692	0.263261	-0.894561	-0.445078	0.33161	0.124209	-0.596706	1.47201	1.14901	0.965556	0.1232	0.0009	0.0671	0.0006	0.0183	0	0	0	0	0	0	0	0	0	0.0122	0	0.0142	0	0	0	0.0126
TCGA.AD.6889.01	male	76	t3	n0	m0	MSI	1	2532	0	2532	1	1516	1	1516	CMS1	0	0.0312111	0.968789	4.96083	1.57083	0.914436	-0.735165	-1.0961	0.0957918	-0.847862	1.10416	1.17891	1.641	0.061	0	0.0257	0.0021	0.0482	0	0	0	0.0134	0.0037	0	0	0	0	0.0409	0	0.0078	0	0	0.0027	0
TCGA.DM.A28K.01	male	75	t3	n0	m0	MSS	0	2988	0	2988	NA	NA	0	2988	CMS3	0.403861	0.148149	0.447991	1.00037	-2.91061	0.142297	-0.89541	-1.58631	1.96719	-1.18269	0.0808178	0.319439	1.69077	0.0107	0	0	0	0.009	0	0	0	0	0.0256	0	0	0	0	0.0395	0	0.002	0	0	0.0068	0.0057
TCGA.QG.A5Z2.01	male	61	t2	n0	m0	MSI	0	952	0	952	0	952	0	952	CMS3	0.141664	0.228053	0.630283	2.48553	-0.0116171	1.79623	0.402659	-0.413639	-0.0517308	-0.7882	0.176519	-0.0276361	-1.56786	0.168	0	0	0.2854	0	0.003	0.013	0	0.016	0	0.0017	0.0443	0.0412	0	0.0484	0	0.068	0	0	0.0066	0
TCGA.G4.6294.01	male	75	t3	n1	m1	MSS	1	858	1	858	NA	NA	1	517	CMS2	0.635663	0.1212	0.243136	-0.607488	1.0575	-1.22301	-1.69987	-1.60699	0.234001	-0.277862	0.581076	-0.00375703	0.394427	0.065	0	0	0	0.0083	0	0.0079	0	0	0	0.0006	0.0205	0	0	0.0388	0	0	0	0	0.0022	0.0002
TCGA.QG.A5Z1.01	male	71	t3	n1		MSS	1	256	0	256	NA	NA	0	256	CMS2	0.5888	0.151712	0.259488	-0.451572	0.224822	-0.795732	-1.34041	-1.15722	0.244736	-1.35191	-0.651693	-0.805167	-1.93518	0.0548	0.0035	0.1109	0	0	0	0	0	0.0033	0	0	0	0	0	0.0371	0.0107	0.0007	0	0	0.0001	0.0012
TCGA.G4.6628.01	male	78	t2	n0	m0	MSI	0	2424	0	2424	0	2424	0	2424	CMS1	0	0.387929	0.612071	3.07725	2.39506	1.4019	2.5162	2.46129	-0.395383	1.03527	-1.73169	0.990146	-0.246302	0.5147	0	0.0245	0.0771	0.1627	0.0016	0	0	0	0	0.0072	0.089	0.1274	0.0139	0.1103	0.0032	0.0384	0	0	0.0746	0.0283
TCGA.D5.6534.01	female	62	t3	n0	m0	MSS	0	1316	0	1316	0	1316	0	1316	CMS4	0.484851	0.387801	0.127348	-1.24222	1.77343	4.18846	0.779466	1.29466	0.880843	-0.628317	0.451478	0.807164	-2.1706	0.641	0.022	0.1793	0.0397	0	0	0.0708	0	0	0	0	0.0461	0.0424	0	0.3966	0.0904	0.045	0.0025	0.0001	0.1206	0.0548
TCGA.DM.A1DB.01	male	68	t3	n0	m0	MSS	1	1348	NA	1348	NA	NA	0	1348	CMS2	0.678986	0.0747907	0.246223	-0.628787	1.99643	-1.61027	-2.17513	-1.58457	-0.742507	1.88104	0.977052	-1.93647	-1.04727	0.0772	0	0	0	0	0	0	0	0.0089	0	0.0163	0.0684	0.0437	0	0.0107	0	0.0043	0.0047	0	0.0014	0.003
TCGA.A6.5659.01	male	82	t2	n0	m0		0	926	0	926	0	926	0	926	NA	0.304811	0.233425	0.461764	1.18964	-1.75753	-2.89127	0.0275988	-0.358347	-0.554105	-1.21471	-3.4062	0.971279	1.86527	0.1076	0.0005	0.0264	0	0	0.0023	0	0	0	0	0.0129	0.0105	0.0009	0	0.0288	0.007	0	0.0222	0	0.0015	0.0054
TCGA.A6.5660.01	male	73	t3	n2	m0	MSS	0	888	0	888	0	888	0	888	CMS2	0.783933	0	0.216067	-0.81728	2.16564	-1.02498	-3.3843	1.19983	0.937392	-0.46389	1.15496	0.101065	-0.142929	0.1021	0.0014	0.0595	0	0	0.0001	0	0	0	0	0.0036	0	0	0	0.0602	0	0	0.0195	0	0.006	0.0038
TCGA.CM.5862.01	male	80	t3	n1	m1	MSS	1	153	1	153	NA	NA	1	31	CMS2	0.398537	0.357128	0.244335	-0.368808	-1.69189	-4.35815	0.759339	0.515213	0.296192	-1.29265	-3.35775	0.452362	2.42946	0	0	0.0345	0	0.0268	0	0	0	0	0	0.002	0	0	0	0.0158	0	0	0.0204	0	0	0.0229
TCGA.F4.6805.01	female	58	t3	n0	m0	MSS	0	1047	0	1047	0	1047	0	1047	CMS4	0.424852	0.442386	0.132762	-1.14734	1.62112	1.09102	1.36157	-0.211358	-0.0165288	-0.248205	0.39793	-0.112444	-0.898093	0.2393	0	0.1995	0.0021	0	0	0	0	0	0	0	0	0	0	0.153	0.0379	0.0209	0	0	0.0378	0.0285
TCGA.CK.4951.01	female	79	t3	n0	m0	MSI	1	2134	0	2134	NA	NA	1	480	CMS1	0.205243	0.290542	0.504216	1.57295	0.325048	1.67261	0.730783	0.125259	-0.139321	-0.647463	-0.0871302	-0.753259	-0.237352	0.2703	0.0021	0.1414	0.0044	0	0.0031	0.0073	0.0008	0	0	0.0013	0.0137	0.036	0	0.0492	0.0014	0.0106	0.0071	0	0.0143	0.0204
TCGA.F4.6704.01	male	60	t3	n2		MSS	0	47	0	47	NA	NA	0	47	CMS4	0.45426	0.430387	0.115353	-1.29342	0.837203	0.472633	1.19213	1.36444	-0.237757	-1.17742	0.16373	-0.220803	0.274132	0.1441	0.0017	0.186	0	0.0075	0	0	0	0	0	0.0025	0.0055	0.0026	0	0.086	0.103	0	0	0	0.0077	0.0514
TCGA.CK.6751.01	female	88	t2	n0		MSS	0	3780	0	3780	NA	NA	0	3780	CMS3	0.242578	0.199173	0.558248	1.90127	0.127856	0.445023	-0.0822259	0.529032	-0.0699927	-0.709555	0.676769	-0.0573383	0.942661	0.1239	0.0005	0.1186	0	0	0	0	0	0	0	0	0	0.0005	0	0.0401	0.0126	0.0164	0.0025	0	0.0024	0.0262
TCGA.AD.A5EJ.01	female	74	t3	n0		MSI	0	0	0	0	NA	NA	0	0	CMS1	0.00200817	0.156831	0.84116	4.04443	0.609477	2.26716	0.200521	-0.948779	0.0624712	-0.903893	0.55677	0.86362	0.750652	0.0416	0	0.0669	0.0015	0.0888	0	0	0	0	0	0.0001	0	0	0	0.0337	0	0.0104	0	0	0.002	0.0065
TCGA.CA.6716.01	male	65	t3	n0	m0	MSS	0	371	0	371	0	371	0	371	CMS2	0.371807	0.100584	0.527609	1.56884	1.82324	-1.76488	-1.18696	-2.01161	-3.08825	0.14397	-2.20717	2.51632	-0.977371	0	0.0012	0.0619	0	0	0	0	0	0.0077	0	0	0.0041	0	0	0.0319	0.0057	0.0019	0	0	0	0.0066
TCGA.F4.6806.01	female	59	t2	n0	m0	MSS	0	1260	0	1260	1	336	1	336	CMS3	0.454353	0.179504	0.366144	0.398933	-0.686903	1.13816	-0.778311	-1.05688	-0.114961	-0.548618	0.651338	0.837584	0.212	0.0787	0.0038	0.0494	0.044	0	0	0.0049	0	0.0108	0.0017	0.0036	0.0121	0.0099	0	0.0181	0.0028	0.0262	0	0	0.0003	0.0032
TCGA.D5.6531.01	male	75	t3	n0	m0	MSS	0	540	0	540	NA	NA	0	540	CMS1	0.218986	0.0879429	0.693071	2.83406	-0.105185	0.135949	-0.895388	0.0755996	-0.492866	1.83907	1.48447	-1.72009	0.430364	0.1657	0	0.0919	0.0021	0.0401	0	0	0	0	0	0.0002	0.0021	0.025	0	0.0478	0.0104	0.0063	0.0145	0	0.0054	0.0004
TCGA.DM.A1D9.01	female	67	t3	n0	m0	MSS	0	4270	0	4270	NA	NA	0	4270	NA	0.71699	0.0484616	0.234549	-0.744528	-0.0893494	0.272305	-2.47909	-0.130897	-1.88901	0.029299	-0.166168	-1.51407	1.05108	0.0228	0.0037	0.0142	0	0	0	0	0	0	0	0.0022	0.0071	0	0	0.0159	0	0.0149	0.0043	0	0.0013	0
TCGA.DM.A0XF.01		68					1	1162	NA	1162	NA	NA	0	1162	CMS2	0.653235	0.292778	0.053987	-1.90104	0.657309	-0.139301	-0.397406	-0.236176	-0.216837	-0.154842	-0.347666	-1.66298	0.700666	0.0911	0.0022	0.0449	0.0001	0	0	0	0	0	0	0.0082	0.0091	0.0037	0	0.0142	0.002	0.0004	0.0004	0	0	0
TCGA.AZ.6603.01	female	77	t2	n1		MSS	1	899	0	899	0	899	0	899	CMS2	0.987988	0.0120119	0	-3.00502	-0.582003	0.624596	-3.41971	0.850204	0.587693	-0.366901	0.394395	-0.207122	-1.73434	0.2204	0.0023	0.0586	0	0.0038	0	0.0077	0	0	0	0	0.0101	0	0	0.0229	0.0091	0.0035	0.002	0	0.0029	0.0265
TCGA.NH.A5IV.01	female	90	t3	n0		MSI	0	588	0	588	0	588	0	588	CMS3	0.454641	0.127144	0.418215	0.75005	-4.91392	2.26895	-1.19023	-1.11988	0.381661	-1.1181	0.235787	1.1573	-0.940079	0.2362	0	0.031	0.0478	0.0391	0	0.0115	0	0	0.0251	0.002	0.0401	0.0412	0.0103	0.0134	0	0.0491	0	0	0.0149	0.0027
TCGA.A6.6651.01	female	55	t3	n1		MSS	0	662	0	662	NA	NA	0	662	CMS4	0.280226	0.718314	0.00145998	-1.89278	1.73376	-0.10463	3.89834	0.101465	-1.94154	-0.217745	0.272773	-0.704776	-0.339734	0.4037	0.0012	0.2035	0.0547	0	0	0.0082	0	0	0	0	0.0447	0.0132	0	0.1324	0.1243	0.0075	0.0039	0	0.0333	0.1014
TCGA.CA.6715.01	male	63	t3	n1	m0	MSS	0	383	0	383	0	383	0	383	CMS2	0.737897	0.127125	0.134978	-1.4368	-0.249795	-2.38511	-1.91481	0.20294	-0.0674159	1.39383	-1.49162	1.37495	-1.36483	0	0	0.021	0	0.0038	0	0	0	0	0	0	0.0007	0	0	0.0124	0	0	0	0	0	0.0032
TCGA.CM.6674.01	male	39	t3	n0	m0	MSI	0	394	0	394	NA	NA	0	394	CMS1	0.351028	0.437871	0.211101	-0.546886	0.940784	1.99024	1.51493	-0.0566207	0.014492	-0.622297	0.600663	0.786016	1.0861	0.1604	0.0004	0.1022	0	0	0	0	0	0	0	0.0007	0	0.0169	0	0.0418	0.0009	0.0094	0	0	0.0079	0.0161
TCGA.D5.6932.01	male	69	t3	n0	m0	MSS	0	346	0	346	NA	NA	0	346	CMS2	0.618923	0.206496	0.174581	-1.05385	0.967528	-0.500651	-0.987223	0.0968081	-0.363932	-2.98118	0.343378	2.38891	0.77346	0.1439	0	0.0962	0	0.0189	0	0	0	0.0181	0.008	0	0.0144	0	0	0.0538	0.0096	0.0079	0	0	0.013	0.0214
TCGA.A6.6137.01	male	55	t3	n1	m0	MSS	0	824	0	824	0	824	0	824	CMS2	0.605069	0.265153	0.129778	-1.34273	-0.570834	-0.694057	-0.491156	0.238609	0.0315571	-0.525448	0.467884	-0.378958	-1.47034	0.1951	0	0.0006	0.0271	0	0.0043	0.0065	0	0.0226	0.0059	0	0.0107	0.0161	0	0.12	0	0.0183	0.0017	0	0.0119	0.0253
TCGA.DM.A28M.01	male	63	t3	n0	m0	MSS	0	2895	0	2895	NA	NA	0	2895	CMS3	0.387774	0.237004	0.375222	0.524944	-0.945651	-1.23937	-0.156483	-1.50838	2.33332	1.24925	1.46448	-0.745168	2.23833	0	0	0	0	0.0261	0	0	0	0	0	0.0032	0	0	0	0.0136	0	0.0129	0.0051	0	0	0.002
TCGA.F4.6459.01	female	61	t3	n2	m0	MSS	1	262	0	262	NA	NA	0	262	CMS4	0.507604	0.354896	0.1375	-1.19584	2.89727	-0.800351	0.462871	-1.21575	0.462167	2.48086	-1.68009	0.79012	-2.45095	0.1563	0.0394	0.1613	0	0	0	0	0	0	0	0	0.003	0	0	0.0056	0.07	0.0003	0.0005	0	0.0031	0.0258
TCGA.A6.2684.01	female	75	t2	n0	m0		0	1127	0	1127	NA	NA	1	976	CMS4	0.517855	0.295831	0.186314	-0.876385	-0.0602256	0.991667	-0.0271919	-0.178685	-0.252873	-0.476761	0.231232	-0.160422	0.955317	0.1936	0.0012	0.1691	0	0	0.0059	0.0026	0.0059	0	0	0.0038	0.0086	0.0037	0	0.1164	0.0211	0.0061	0.0088	0.0094	0.0251	0.0023
TCGA.A6.6780.01	male	74	t3	n0			0	612	0	612	0	612	0	612	NA	0.165678	0.283452	0.55087	1.92626	0.707162	0.395524	0.776297	0.767543	-0.0823573	1.46241	1.99084	-0.603135	0.566244	0.3277	0	0.0179	0.0724	0	0.029	0	0.0091	0	0	0.0194	0.0367	0.0641	0.0001	0.0389	0	0.0387	0.013	0	0.0249	0.0021
TCGA.AZ.6607.01	male	69	t4	n2	m1	MSS	1	97	1	97	NA	NA	1	97	CMS4	0.197642	0.431974	0.370384	0.677183	1.26646	1.32939	1.8609	-0.705277	0.632616	3.49137	-1.08658	0.752084	-2.13245	0.3421	0.0041	0.2647	0	0	0	0.0157	0	0	0	0.002	0.0034	0.0289	0	0.0546	0.0091	0.0016	0.0043	0	0.033	0.0212
TCGA.G4.6322.01	male	65	t3	n1		MSS	0	792	0	792	NA	NA	1	789	CMS3	0.281252	0.146938	0.57181	1.95519	-1.27926	-0.546982	-0.591346	4.27773	-1.71271	-0.781605	0.296861	-2.34816	1.00799	0.0687	0	0.0416	0.0037	0	0	0	0	0	0.0324	0	0	0	0	0.0405	0	0.0106	0.002	0	0.0057	0.0439
TCGA.A6.A565.01	female	34	t3	n2		MSS	1	494	1	494	NA	NA	1	301	CMS3	0.326261	0.625113	0.0486262	-1.61925	1.1206	2.63472	3.04869	0.392021	0.262353	-0.570222	-0.542622	-0.98012	-0.563851	0.2505	0.0008	0.1251	0.2923	0	0	0.1042	0	0.0029	0	0.0009	0.0642	0.0573	0	0.0928	0.0023	0.0568	0	0	0.025	0.0883
TCGA.A6.A56B.01	male	57	t3	n1	m0	MSS	1	1711	0	1711	1	1678	1	1678	NA	0.416307	0.274071	0.309622	0.0544994	2.10838	-2.56868	0.061637	-0.00314648	1.25076	-1.40108	0.356316	-0.35265	-1.42241	0.0563	0	0.0652	0	0	0	0	0	0.0308	0	0	0.0051	0	0	0.0189	0	0.0178	0	0	0.0039	0.0038
TCGA.AY.A54L.01	female	74	t2	n0	m0	MSS	0	525	0	525	1	396	1	396	NA	0.4995	0.236247	0.264253	-0.332572	-2.90416	-1.98958	-0.448168	1.02394	1.80963	-1.26105	0.005538	-1.28847	0.970977	0	0	0	0	0.0139	0	0	0	0	0	0.0068	0.0123	0.0005	0	0.0195	0	0.0048	0.0085	0	0	0
TCGA.A6.5665.01	female	84	t3	n0	m0		0	671	0	671	NA	NA	1	529	CMS1	0.0732198	0.159904	0.766876	3.47388	0.634986	1.73746	0.042523	-0.917897	0.0704593	-0.778891	0.368425	0.310829	-0.0566884	0.1545	0	0.0617	0.0414	0.0292	0.0075	0	0.0041	0	0	0.0067	0.0069	0.0149	0	0.0135	0	0.0164	0.0058	0	0.0049	0.0001
TCGA.A6.2677.01	female	68	t3	n2	m0		1	740	0	740	NA	NA	0	740	NA	0.609605	0.113222	0.277173	-0.352453	0.126647	-2.22141	-1.69588	0.23709	0.74982	-2.92134	-0.25149	0.573428	2.78446	0.0394	0	0	0.0325	0	0.0122	0	0.0104	0	0	0.0106	0.0356	0.0127	0	0.0493	0.0101	0.0078	0.0188	0.0173	0	0
TCGA.AD.6963.01	male	58	t3	n0		MSS	0	834	0	834	0	834	0	834	CMS2	0.550684	0.449316	0	-2.23762	0.317066	-0.0363451	1.1009	1.43733	-0.028176	1.65901	-1.46526	1.42382	0.212752	0.1843	0	0	0.0108	0.0674	0	0	0	0	0	0.0078	0.0348	0.0308	0	0.0609	0	0.0167	0	0	0.0058	0.0099
TCGA.AY.6197.01	male	60	t3	n0		MSI	0	652	0	652	0	652	0	652	CMS1	0.250797	0.158549	0.590654	2.11197	0.16728	0.325353	-0.422269	-0.747009	0.25871	-0.954637	1.97155	2.7687	-1.22559	0.1022	0	0.0084	0.0128	0.0207	0.0005	0	0	0.0098	0	0.0001	0.0057	0.0046	0	0.0237	0	0.0184	0	0	0.003	0.0076
TCGA.D5.6541.01	male	49	t3	n0	m0	MSS	0	474	0	474	NA	NA	0	474	CMS4	0.524826	0.329982	0.145192	-1.16068	-0.913744	1.1277	0.223173	0.251128	-0.0872705	-0.381956	-0.448283	-1.47686	1.09622	0.2431	0	0.1128	0.0626	0	0	0	0	0	0	0.0059	0.0269	0.0282	0	0.0348	0.028	0.0095	0.0121	0	0.0112	0.0044
TCGA.CM.5348.01	male	72	t3	n1	m0	MSS	0	699	0	699	NA	NA	0	699	CMS4	0.25161	0.513908	0.234481	-0.292426	-0.16312	-0.907429	2.36631	1.9941	1.52378	-1.1348	-0.503981	-2.26676	-2.19953	0.2311	0.0054	0.1599	0	0.0069	0	0.0066	0	0.005	0	0	0	0	0	0.0824	0.0491	0.003	0	0	0.036	0.0051
TCGA.4T.AA8H.01	female	42	t3	n0		MSS	0	385	0	385	0	385	0	385	CMS3	0.413473	0.197811	0.388716	0.591011	-4.95032	-0.533254	-0.529993	-0.604716	2.35572	1.10971	0.978852	-1.50061	1.17809	0	0	0	0.0082	0	0	0	0	0.0093	0.0186	0.0025	0.0098	0	0	0.0513	0	0.0167	0	0	0	0.0022
TCGA.DM.A28G.01	male	75	t3	n0	m0	MSS	1	1849	NA	1849	NA	NA	0	1849	CMS3	0.494093	0.184397	0.32151	0.0590812	-1.17813	-0.0192469	-0.841514	0.154191	0.155781	-0.612402	0.257601	-0.578045	1.76474	0.0221	0	0.0021	0.0077	0	0	0	0	0.0004	0	0.004	0.016	0.0047	0	0.0353	0	0.0104	0.0031	0	0.0002	0.0029
TCGA.5M.AATE.01	male	76	t3	n0	m0	MSS	0	1200	0	1200	NA	NA	1	810	CMS2	0.81908	0.130149	0.0507709	-2.08402	-1.39022	-1.31721	-2.09869	-0.180677	-0.0863169	1.2349	-2.84647	-0.0198411	0.0466432	0.0405	0	0.0085	0.0148	0	0	0	0	0.0049	0	0	0.0161	0	0	0.0308	0	0.0074	0	0	0	0.0008
TCGA.DM.A28C.01	male	74	t3	n0	m0	MSS	1	2475	NA	2475	NA	NA	1	1929	CMS2	0.559355	0.112637	0.328008	0.0394664	0.897918	-0.479495	-1.57196	-1.90676	0.2349	-0.265745	0.220626	-0.331573	0.549319	0	0	0	0.0034	0	0	0	0	0.0103	0.0021	0	0.0183	0	0	0.0185	0	0.017	0	0	0	0
TCGA.DM.A0XD.01	male	65	t3	n0	m0	MSS	1	743	NA	743	NA	NA	1	484	CMS1	0.294578	0.252804	0.452618	1.13787	-0.779077	-0.146582	0.205951	0.0762507	0.986807	1.54539	0.929045	-2.25627	2.84548	0.0236	0.0027	0.088	0.0077	0.0091	0	0	0	0	0	0.0086	0	0	0	0.0221	0.003	0.0035	0.001	0	0.0047	0
TCGA.DM.A282.01	female	60	t3	n0	m0	MSS	0	4233	0	4233	NA	NA	0	4233	CMS2	0.603563	0.146697	0.24974	-0.531706	0.427124	-0.122426	-1.41755	-1.55739	0.115329	-0.309228	0.666799	0.503572	1.81594	0.0245	0.0039	0.0819	0	0.0077	0	0	0	0.0008	0	0.0063	0	0	0	0.0061	0.0016	0.0004	0	0	0	0.0026
TCGA.CM.4744.01	male	69	t2	n0	m0	MSS	0	609	0	609	0	609	0	609	CMS1	0.31702	0.224764	0.458217	1.15383	-2.09402	-0.158858	-0.0716482	2.05915	0.28172	-0.55784	0.328448	-1.54046	2.95711	0.1677	0	0	0.0178	0.08	0	0	0	0	0	0.0165	0.0412	0.0596	0	0.046	0	0.0195	0.0019	0	0.0074	0
TCGA.AZ.6605.01	male	77	t4	n1	m0	MSS	1	159	0	159	NA	NA	0	159	CMS4	0.538981	0.423493	0.0375265	-1.90101	1.43982	0.760767	0.921316	0.474676	-0.560069	-0.439257	0.864127	0.632855	0.00191184	0.3021	0	0.1756	0.0178	0	0	0.0209	0	0	0	0.0015	0.0179	0.014	0	0.0784	0.0379	0.0154	0.0009	0	0.0195	0.0599
TCGA.AY.A71X.01	female	54	t2	n0	m0	MSS	0	588	0	588	0	588	0	588	CMS3	0.289944	0.179155	0.5309	1.67066	-3.54099	-1.33336	-0.360568	-2.08277	-0.722591	-0.882704	0.632227	0.625339	0.795878	0	0	0	0	0	0	0	0	0.0226	0.0383	0.0008	0.0091	0	0	0.0213	0	0.0186	0	0	0	0
TCGA.A6.6782.01	male	82	t4	n0		MSS	0	617	0	617	0	617	0	617	CMS4	0.637446	0.277657	0.0848974	-1.67709	0.505443	-0.0663439	-0.475766	-0.366594	0.230056	-2.46068	-0.833839	0.263334	1.23301	0.2287	0.0671	0.083	0.0039	0.0411	0	0	0	0	0	0.0025	0.0079	0.0063	0	0.0361	0.0476	0	0	0	0.0086	0.045
TCGA.CM.4751.01	male	62	t3	n1	m0	MSS	0	822	0	822	0	822	0	822	CMS1	0.281365	0.309613	0.409022	0.856518	-0.0227254	0.675557	0.68587	1.20152	-0.136428	-0.740726	-0.0234086	-1.20842	0.167658	0.298	0	0.0926	0.0449	0	0	0.0053	0	0	0.009	0	0.0154	0.0218	0	0.0305	0	0.0318	0	0	0.0176	0.0154
[truncated: 46 more columns]

## Sheet: Table 2
Patient	Sex	Age	Pathology_T_stage	Pathology_N_stage	MSI
01CO001	Male	729	T4a	N2b	MSS
01CO005	Female	838	T3	N0	MSS
01CO006	Female	904	T4a	N2b	MSS
01CO008	Female	652	T3	N0	MSS
01CO013	Male	695	T2	N0	MSS
01CO014	Female	930	T3	N2a	MSI-H
01CO015	Male	1065	T2	N0	MSS
01CO019	Female	757	T4a	N2a	MSS
01CO022	Female	921	T2	N0	MSI-H
05CO002	Female	NA	T2	N1a	MSS
05CO003	Male	NA	T3	N0	MSI-H
05CO004	Female	480	T3	N1b	NA
05CO005	Male	744	T2	N0	MSS
05CO006	Female	996	T3	N1b	MSI-H
05CO007	Female	1020	T4a	N2b	MSI-H
05CO011	Male	469	T3	N0	MSS
05CO014	Female	881	T3	N1b	MSS
05CO015	Female	883	T3	N0	MSI-H
05CO020	Female	1116	T3	N0	MSS
05CO026	Female	840	T3	N1a	MSS
05CO028	Female	737	T2	N0	MSS
05CO029	Female	662	T3	N0	MSS
05CO032	Male	948	T3	N1a	MSI-H
05CO033	Male	737	T2	N2a	MSS
05CO034	Female	656	T3	N1a	MSS
05CO035	Female	768	T3	N0	MSS
05CO037	Male	601	T3	N0	MSI-H
05CO039	Male	887	T4a	N0	MSI-H
05CO041	Female	947	T3	N0	MSI-H
05CO044	Female	847	T4a	N0	MSI-H
05CO045	Female	902	T3	N1b	MSS
05CO047	Male	677	T2	N0	MSS
05CO048	Female	940	T4b	N2a	MSI-H
05CO049	Male	1052	T3	N0	MSS
05CO050	Female	801	T3	N1b	MSI-H
05CO053	Male	620	T3	N1b	MSS
05CO054	Male	1038	T2	N0	MSS
05CO055	Female	643	T4a	N2b	MSS
06CO001	Male	904	T3	N1b	MSS
06CO002	Female	876	T3	N2a	MSS
09CO005	Female	832	T3	N1a	MSS
09CO006	Male	1041	T2	N0	MSS
09CO008	Male	643	T3	N1a	MSS
09CO011	Female	905	T2	N0	MSS
09CO013	Male	605	T3	N1b	MSS
09CO014	Male	803	T3	N0	MSS
09CO015	Male	824	T3	N1b	MSS
09CO018	Female	633	T2	N1a	MSS
09CO019	Male	1055	T2	N0	MSS
09CO022	Female	861	T4a	N0	MSS
11CO005	Female	792	T3	N1	MSS
11CO007	Female	768	T3	N0	MSI-H
11CO008	Female	804	T3	N1	MSS
11CO010	Female	708	T3	N0	MSS
11CO018	Male	893	T3	N0	MSI-H
11CO019	Female	892	T3	N1b	MSS
11CO020	Male	665	T3	N1b	MSS
11CO021	Female	897	T3	N2a	MSS
11CO022	Male	865	T4b	N0	MSS
11CO027	Female	660	T3	N0	MSS
11CO030	Female	658	T3	N0	MSS
11CO031	Female	646	T3	N0	MSI-H
11CO032	Male	695	T3	N1b	MSS
11CO033	Male	658	T3	N0	MSI-H
11CO036	Male	442	T3	N1a	MSI-H
11CO037	Female	628	T3	N1b	MSS
11CO039	Female	814	T3	N0	MSS
11CO042	Male	848	T3	N0	MSS
11CO043	Female	805	T3	N0	MSS
11CO044	Female	830	T3	N1a	MSS
11CO045	Female	853	T3	N1b	MSS
11CO047	Male	783	T3	N0	MSS
11CO048	Male	769	T3	N0	MSS
11CO051	Female	734	T3	N0	MSI-H
11CO052	Female	798	T3	N2a	MSS
11CO053	Female	763	T3	N0	MSS
11CO054	Female	788	T3	N0	MSS
11CO057	Male	883	T3	N1	MSS
11CO058	Female	678	T3	N0	MSS
11CO059	Female	1000	T3	N0	MSI-H
11CO060	Female	859	T3	N0	MSS
11CO061	Female	575	T3	N0	MSI-H
11CO062	Male	899	T3	N0	MSS
11CO070	Male	423	T3	N1b	NA
11CO072	Female	778	T3	N1b	MSS
11CO077	Male	813	T3	N0	MSS
11CO079	Female	902	T3	N1	MSS
13CO001	Male	840	T3	N1a	NA
14CO001	Female	589	T3	N1a	NA
14CO002	Male	755	T3	N0	MSS
14CO003	Female	895	T3	N2b	MSI-H
14CO005	Female	902	T3	N0	MSS
15CO001	Female	684	T3	N1a	MSS
15CO002	Female	636	T4a	N0	MSS
16CO002	Male	810	T3	N1	MSS
16CO003	Female	758	T3	N0	MSS
16CO006	Male	771	T3	N0	MSS
16CO011	Male	708	T3	N1	MSS
16CO012	Female	894	T2	N0	MSS
20CO001	Female	645	T3	N1a	MSS
20CO003	Female	723	T4a	N1b	MSI-H
20CO004	Male	667	T4a	N2b	MSS
20CO006	Male	697	T3	N1a	NA
20CO007	Male	656	T3	N0	MSS
21CO006	Male	912	T2	N0	MSS
21CO007	Male	600	T4a	N2a	MSS
22CO004	Male	623	T3	N0	MSS
22CO006	Female	689	T3	N2b	MSI-H
24CO005	Female	492	T2	N1b	MSS
27CO004	Female	610	T3	N2a	MSS

## Sheet: Table 3
Patient	Sex	Age
CRC1	Male	61
CRC2	Female	55
CRC3	Male	44

## Sheet: Table 4
Patient	Dataset	Sex	Age	MSI	TNM
CRC-JSC-S02	CRC-SG2	M	47	MSI-H	T1N1M0
CRC-JSC-S03	CRC-SG2	F	59	MSI-H	T3N0M0
CRC-JSC-S04	CRC-SG2	F	65	MSS	T4bN2aM0
CRC-JSC-S05	CRC-SG2	M	79	MSI-H	T3N0M0
CRC-JSC-S06	CRC-SG2	M	80	MSS	T4aN1M0
CRC-JSC-S07	CRC-SG2	M	66	MSS	T3N0M0
CRC-JSC-S08	CRC-SG2	M	64	MSS	T3N1bM0
CRC-JSC-S10	CRC-SG2	M	50	MSS	T4aN0M0
CRC-JSC-S12	CRC-SG2	F	79	MSS	T4aN1bM0
CRC-JSC-S13	CRC-SG2	M	72	MSS	T4aN1bMx
CRC-JSC-S14	CRC-SG2	M	66	MSS	T3N1bM0
CRC-JSC-S15	CRC-SG2	M	72	MSS	T3N0M0
CRC2783	CRC-SG1	F	31	MSI-H	T3N1bM0
CRC2816	CRC-SG1	M	59	MSS	T3N1bM0
CRC2786	CRC-SG1	M	68	MSS	T3N0M0
CRC2787	CRC-SG1	F	61	MSS	T3N0M0
CRC2794	CRC-SG1	F	65	MSS	T3N0M0
CRC2795	CRC-SG1	M	58	MSS	T4aN1aM0
CRC2801	CRC-SG1	M	50	MSS	T4aN2bM0
CRC2803	CRC-SG1	M	60	MSS	T3N1aM0
CRC2810	CRC-SG1	F	76	MSS	T4bN2bM0
CRC2811	CRC-SG1	M	63	MSS	T3N2bM0
CRC2817	CRC-SG1	M	67	MSI-H	T4bN1bM0
CRC2821	CRC-SG1	F	NA	MSS	T3N2bM0
CRC2841	CRC-SG1	M	64	MSS	T4aN2bM0
CRC2899	CRC-SG1	F	76	MSS	T3N1aM0

## Sheet: Table 5
Patient	Treatment	Response	pctChange	MSI	RECIST	PFSmo
P02	Pre	R	-100	MSS	PR	28.4
P02	On	R	-100	MSS	PR	28.4
P03	Pre	NR	8.6	MSS	SD	3.7
P03	On	NR	8.6	MSS	SD	3.7
P07	Pre	NR	-2.09	MSS	PD	1.93333
P10	Pre	R	-24.23	MSS	SD	10.9667
P10	On	R	-24.23	MSS	SD	10.9667
P11	Pre	R	-68.18	MSI	PR	14.8667
P11	On	R	-68.18	MSI	PR	14.8667
P12	Pre	NR	-22.89	MSS	SD	3.76667
P13	Pre	R	-33.48	MSS	PR	7.4
P13	On	R	-33.48	MSS	PR	7.4
P14	Pre	NR	30.1	MSI	PD	1.8
P14	On	NR	30.1	MSI	PD	1.8
P15	Pre	NR	-0.51	MSS	SD	3.03333
P15	On	NR	-0.51	MSS	SD	3.03333
P17	Pre	R	-35.54	MSS	PR	15.2
P18	Pre	R	-51.1	MSS	PR	9.56667
P18	On	R	-51.1	MSS	PR	9.56667
P19	Pre	NR	23.56	MSI	PD	1.73333
P19	On	NR	23.56	MSI	PD	1.73333
P20	Pre	R	-79.89	MSS	PR	9
P20	On	R	-79.89	MSS	PR	9
P21	Pre	NR	-27.25	MSS	SD	5.56667
P23	Pre	R	-81.57	MSS	CR	6.7
P23	On	R	-81.57	MSS	CR	6.7
P24	Pre	R	-53.35	MSS	PR	6.53333
P24	On	R	-53.35	MSS	PR	6.53333
P25	Pre	NR	-4.69	MSS	PD	1.56667
P25	On	NR	-4.69	MSS	PD	1.56667
P26	On	R	-100	MSI	PR	9999
P27	Pre	NR	-21.41	MSS	SD	4.06667
P28	Pre	NR	-4.56	MSS	PD	1.83333
P28	On	NR	-4.56	MSS	PD	1.83333
P29	Pre	NR	-9.09	MSS	PD	0.466667
P29	On	NR	-9.09	MSS	PD	0.466667
P30	Pre	NR	2.84	MSS	SD	5.53333
P30	On	NR	2.84	MSS	SD	5.53333
P32	Pre	R	-10.21	MSS	SD	9999
P32	On	R	-10.21	MSS	SD	9999
P33	Pre	NR	0	MSS	NE	7.53333
P33	On	NR	0	MSS	NE	7.53333
P34	Pre	NR	-5.42	MSS	PD	1.66667
P35	Pre	NR	-14.69	MSS	SD	3.7
P36	Pre	NR	-0.95	MSS	SD	3.73333
P36	On	NR	-0.95	MSS	SD	3.73333

## Sheet: Table 6
Patient	Sex	Age	Site
S1	Female	69	Left colon
S2	Male	73	Right colon
S3	Female	62	Right colon
S4	Male	53	Left colon

## Sheet: Table 7
Primer sequences for RT-qPCR
Gene name	Forward primer (5’-3’)	Reverse primer (5’-3’)
CA1	TAGTGTCTCCTACAACCCAGCC	GCTGTCAGAGAAAGGACCACCT
CD206	AGCCAACACCAGCTCCTCAAGA	CAAAACGCTCGCGCATTGTCCA
CD24	CACGCAGATTTATTCCAGTGAAAC	GACCACGAAGAGACTGGCTGTT
CD40	CCTGTTTGCCATCCTCTTGGTG	AGCAGTGTTGGAGCCAGGAAGA
CD47	TATCCTCGCTGTGGTTGGACTG	TAGTCCAAGTAATTGTGCTAGAGC
CD64	ATACAGGTGCCAGAGAGGTCTC	CCAGCTTATCCTTCCACGCATG
CDH17	GGCAATGTGACTGCCAAGGATC	GCTTCTCTGTCCAATGGAGCCA
CDX2	GAACCTGTGCGAGTGGATG	GGATGGTGATGTAGCGACTG
CXCL16	CCTATGTGCTGTGCAAGAGGAG	CTGGGCAACATAGAGTCCGTCT
F13A1	CAACAGCCACAACCGTTACACC	CTTGGATCAGCACCGCCTCTTT
HEPH	CAGGTGGTCTTCTACAACCGTG	TGGCAACCAAGCCAGGGTAAGA
MUC2	ACTCTCCACACCCAGCATCATC	GTGTCTCCGTATGTGCCGTTGT
P21	TGTCCGTCAGAACCCATGC	AAAGTCGAAGTTCCATCGCTC
SI	ACATTCCAGCCAACTCCTGCTC	GCCCAATAAGCTGGCATGACTG
SLC39A4	CGTGGACTTTGTGTTCCAGCAG	TGTGCCGATGACTGTGGTCACT
SLC39A5	TCACAGGCTTCTGTTGCTGGAC	ACAGCAGAGCAAACTGACGAGG
SLC40A1	GAGACAAGTCCTGAATCTGTGCC	TTCTTGCAGCAACTGTGTCACAG
VAV3	GAGTGGAGTCAGCCATCTCTAG	CACGTTGCATAGGAACCACAAGC
β-actin	CACCATTGGCAATGAGCGGTTC	AGGTCTTTGCGGATGTCCACGT

## Sheet: Table 8
Patient	MSI	Response	Cohort	PMID
MSS1_1	MSS	R	MSS1	PMID35122060
MSS1_2	MSS	NR	MSS1	PMID35122060
MSS1_3	MSS	NR	MSS1	PMID35122060
MSS1_4	MSS	NR	MSS1	PMID35122060
MSS1_5	MSS	NR	MSS1	PMID35122060
MSS1_6	MSS	NR	MSS1	PMID35122060
MSS1_7	MSS	NR	MSS1	PMID35122060
MSS1_8	MSS	NR	MSS1	PMID35122060
MSS1_9	MSS	NR	MSS1	PMID35122060
MSS2_1	MSS	NR	MSS2	PMID37563240
MSS2_2	MSS	R	MSS2	PMID37563240
MSS2_3	MSS	NR	MSS2	PMID37563240
MSS2_4	MSS	NR	MSS2	PMID37563240
MSS2_5	MSS	R	MSS2	PMID37563240
MSS2_6	MSS	R	MSS2	PMID37563240
MSS2_7	MSS	NR	MSS2	PMID37563240
MSS2_8	MSS	R	MSS2	PMID37563240
MSS2_9	MSS	R	MSS2	PMID37563240
MSS2_10	MSS	NR	MSS2	PMID37563240
MSS2_11	MSS	NR	MSS2	PMID37563240
MSS2_12	MSS	R	MSS2	PMID37563240
MSS2_13	MSS	R	MSS2	PMID37563240
MSS2_14	MSS	R	MSS2	PMID37563240
MSS2_15	MSS	R	MSS2	PMID37563240
MSS2_16	MSS	R	MSS2	PMID37563240
MSS2_17	MSS	R	MSS2	PMID37563240
MSS2_18	MSS	R	MSS2	PMID37563240
MSS2_19	MSS	R	MSS2	PMID37563240
MSS2_20	MSS	R	MSS2	PMID37563240
MSS2_21	MSS	R	MSS2	PMID37563240
MSS2_22	MSS	NR	MSS2	PMID37563240
MSS2_23	MSS	NR	MSS2	PMID37563240
MSS2_24	MSS	R	MSS2	PMID37563240
MSS2_25	MSS	R	MSS2	PMID37563240
MSS2_26	MSS	R	MSS2	PMID37563240
MSS2_27	MSS	NR	MSS2	PMID37563240
MSS2_28	MSS	R	MSS2	PMID37563240
MSS2_29	MSS	R	MSS2	PMID37563240
MSS2_30	MSS	R	MSS2	PMID37563240
MSS2_31	MSS	NR	MSS2	PMID37563240
MSS2_32	MSS	R	MSS2	PMID37563240
MSS2_33	MSS	NR	MSS2	PMID37563240
MSS2_34	MSS	R	MSS2	PMID37563240
MSS3_1	MSS	R	MSS3	PMID40882637
MSS3_2	MSS	NR	MSS3	PMID40882637
MSS3_3	MSS	R	MSS3	PMID40882637
MSS3_4	MSS	NR	MSS3	PMID40882637
MSS3_5	MSS	NR	MSS3	PMID40882637
MSS3_6	MSS	R	MSS3	PMID40882637
MSS3_7	MSS	NR	MSS3	PMID40882637
MSS3_8	MSS	R	MSS3	PMID40882637
MSS3_9	MSS	NR	MSS3	PMID40882637
MSS3_10	MSS	R	MSS3	PMID40882637
MSS3_11	MSS	NR	MSS3	PMID40882637
MSS3_12	MSS	R	MSS3	PMID40882637
MSI1_1	MSI	R	MSI1	PMID37269904
MSI1_2	MSI	R	MSI1	PMID37269904
MSI1_3	MSI	NR	MSI1	PMID37269904
MSI1_4	MSI	R	MSI1	PMID37269904
MSI1_5	MSI	R	MSI1	PMID37269904
MSI1_6	MSI	R	MSI1	PMID37269904
MSI1_7	MSI	R	MSI1	PMID37269904
MSI1_8	MSI	R	MSI1	PMID37269904
MSI1_9	MSI	NR	MSI1	PMID37269904
MSI1_10	MSI	NR	MSI1	PMID37269904
MSI1_11	MSI	NR	MSI1	PMID37269904
MSI1_12	MSI	NR	MSI1	PMID37269904
MSI1_13	MSI	R	MSI1	PMID37269904
MSI1_14	MSI	R	MSI1	PMID37269904
MSI1_15	MSI	R	MSI1	PMID37269904
MSI1_16	MSI	R	MSI1	PMID37269904
MSI1_17	MSI	R	MSI1	PMID37269904
MSI1_18	MSI	R	MSI1	PMID37269904
MSI1_19	MSI	NR	MSI1	PMID37269904
MSI1_20	MSI	R	MSI1	PMID37269904
MSI1_21	MSI	R	MSI1	PMID37269904
MSI1_22	MSI	NR	MSI1	PMID37269904
MSI1_23	MSI	R	MSI1	PMID37269904
MSI1_24	MSI	R	MSI1	PMID37269904
MSI1_25	MSI	R	MSI1	PMID37269904
MSI1_26	MSI	R	MSI1	PMID37269904
MSI1_27	MSI	R	MSI1	PMID37269904
MSI1_28	MSI	R	MSI1	PMID37269904
MSI1_29	MSI	R	MSI1	PMID37269904
MSI1_30	MSI	R	MSI1	PMID37269904
MSI1_31	MSI	R	MSI1	PMID37269904
MSI1_32	MSI	R	MSI1	PMID37269904
MSI1_33	MSI	R	MSI1	PMID37269904
MSI1_34	MSI	NR	MSI1	PMID37269904
MSI1_35	MSI	R	MSI1	PMID37269904
MSI1_36	MSI	NR	MSI1	PMID37269904
MSI1_37	MSI	R	MSI1	PMID37269904
MSI1_38	MSI	R	MSI1	PMID37269904
MSI1_39	MSI	R	MSI1	PMID37269904
MSI1_40	MSI	R	MSI1	PMID37269904
MSI1_41	MSI	R	MSI1	PMID37269904
MSI1_42	MSI	R	MSI1	PMID37269904
MSI1_43	MSI	R	MSI1	PMID37269904
MSI1_44	MSI	R	MSI1	PMID37269904
MSI1_45	MSI	R	MSI1	PMID37269904
MSI1_46	MSI	NR	MSI1	PMID37269904
MSI1_47	MSI	NR	MSI1	PMID37269904
MSI1_48	MSI	R	MSI1	PMID37269904
MSI1_49	MSI	R	MSI1	PMID37269904
MSI1_50	MSI	R	MSI1	PMID37269904
MSI1_51	MSI	R	MSI1	PMID37269904
MSI1_52	MSI	R	MSI1	PMID37269904
MSI1_53	MSI	R	MSI1	PMID37269904
MSI1_54	MSI	R	MSI1	PMID37269904
MSI1_55	MSI	R	MSI1	PMID37269904
MSI1_56	MSI	R	MSI1	PMID37269904
MSI1_57	MSI	NR	MSI1	PMID37269904
MSI1_58	MSI	R	MSI1	PMID37269904
MSI1_59	MSI	R	MSI1	PMID37269904
MSI1_60	MSI	R	MSI1	PMID37269904
MSI1_61	MSI	R	MSI1	PMID37269904
MSI1_62	MSI	R	MSI1	PMID37269904
MSI1_63	MSI	R	MSI1	PMID37269904
MSI1_64	MSI	NR	MSI1	PMID37269904
MSI1_65	MSI	R	MSI1	PMID37269904
MSI1_66	MSI	R	MSI1	PMID37269904
MSI1_67	MSI	R	MSI1	PMID37269904
MSI1_68	MSI	NR	MSI1	PMID37269904
MSI1_69	MSI	R	MSI1	PMID37269904
MSI1_70	MSI	NR	MSI1	PMID37269904
MSI2_1	MSI	NR	MSI2	PMID37269904
MSI2_2	MSI	R	MSI2	PMID37269904
MSI2_3	MSI	R	MSI2	PMID37269904
MSI2_4	MSI	R	MSI2	PMID37269904
MSI2_5	MSI	NR	MSI2	PMID37269904
MSI2_6	MSI	NR	MSI2	PMID37269904
MSI2_7	MSI	NR	MSI2	PMID37269904
MSI2_8	MSI	NR	MSI2	PMID37269904
MSI2_9	MSI	R	MSI2	PMID37269904
MSI2_10	MSI	NR	MSI2	PMID37269904
MSI2_11	MSI	NR	MSI2	PMID37269904
MSI2_12	MSI	NR	MSI2	PMID37269904
MSI2_13	MSI	NR	MSI2	PMID37269904
MSI2_14	MSI	NR	MSI2	PMID37269904
MSI2_15	MSI	NR	MSI2	PMID37269904
MSI2_16	MSI	R	MSI2	PMID37269904
MSI2_17	MSI	NR	MSI2	PMID37269904
MSI2_18	MSI	R	MSI2	PMID37269904
MSI2_19	MSI	NR	MSI2	PMID37269904
MSI2_20	MSI	R	MSI2	PMID37269904
MSI2_21	MSI	R	MSI2	PMID37269904
MSI2_22	MSI	R	MSI2	PMID37269904
MSI2_23	MSI	NR	MSI2	PMID37269904
MSI2_24	MSI	NR	MSI2	PMID37269904
MSI2_25	MSI	R	MSI2	PMID37269904
MSI2_26	MSI	NR	MSI2	PMID37269904
MSI2_27	MSI	R	MSI2	PMID37269904
MSI2_28	MSI	R	MSI2	PMID37269904
MSI2_29	MSI	R	MSI2	PMID37269904
MSI2_30	MSI	NR	MSI2	PMID37269904
MSI2_31	MSI	NR	MSI2	PMID37269904
MSI2_32	MSI	NR	MSI2	PMID37269904
MSI2_33	MSI	NR	MSI2	PMID37269904
MSI2_34	MSI	NR	MSI2	PMID37269904
MSI2_35	MSI	NR	MSI2	PMID37269904
MSI2_36	MSI	NR	MSI2	PMID37269904
MSI2_37	MSI	R	MSI2	PMID37269904
MSI2_38	MSI	R	MSI2	PMID37269904
MSI2_39	MSI	NR	MSI2	PMID37269904
MSI2_40	MSI	NR	MSI2	PMID37269904
MSI2_41	MSI	R	MSI2	PMID37269904

## Sheet: Table9
PMID30309915	PMID37497337	PMID28650338	PMID26997480	PMID38538696	PMID38664705	PMID35254400	PMID37022350
CCL5	CD274	CD3D	FREM1	ACBD3	EMB	VEGFA	APOD
CD27	PDCD1	IDO1	TACC2	ACOT8	SLC16A1	FLT1	ASPN
CD274	TOP2A	CIITA	SCN5A	ACTR2	SLC16A3	PIGF	CCL5
CD276	ADAM12	CD3E	OR13C5	ADAM10	SLC16A7	PDGFA	CD52
CD8A		CCL5	FMO1	ADAM9	SLC16A8	PDGFB	COL2A1
CMKLR1		GZMK	UTRN	ADAMTS13	SLC5A12	PLAUR	CXCL11
CXCL9		CD2	KCNH5	AGAP4	SLC5A8	LDHA	CXCL13
CXCR6		HLA.DRA	MUC12	AGFG1	LDHA	IDH1	DUSP5
HLA.DQA1		CXCL13	ZNF534	AHNAK	LDHAL6A	ALDOA	FOXC1
HLA.DRB1		IL2RG	SP140L	AKIRIN1	LDHAL6B		GZMB
HLA.E		NKG7	ITGA9	ANO6	LDHB		HTRA1
IDO1		HLA.E	AMER3	APOL6	LDHC		IDO1
LAG3		CXCR6	ABCA7	ARPC1B	LDHD		IL23A
NKG7		LAG3	OR10J1	ARPC2	COG8		ITM2A
PDCD1LG2		TAGAP	BRCA2	ARSB	DNM1L		KMO
PSMB10		CXCL10	MDN1	ASCC3	HPDL		KRT16
STAT1		STAT1	CDH23	ASXL2	HSD17B10		KYNU
		GZMB	USP6	ATF6	NDUFAF3		MIA
			STAB1	ATL3	NDUFB8		PSMB9
			ACSM2B	ATP2A2	NDUFS2		PTGDS
			CACNA1S	ATP6V1B2	SCO2		RARRES3
			MYOM3	B3GNT2	SUCLG1		RTP4
			CNGB3	B4GALT1	SURF1		S100A8
			DCHS2	BAG4	ACAD9		SFRP1
			PKHD1	BCL10	ACADM		SPTLC2
			LPA	BHLHE40	B3GALNT2		TNFAIP8
			SPAG17	BRF1	B4GAT1		TNFSF10
			DNAH2	BTBD10	CALR
			UNC5D	CAB39	CD46
			DGKI	CALU	CFH
			PLEKHA7	CAP1	CFI
			TRPM2	CAPZA2	CHEK2
			BCLAF1	CASP7	COL4A1
			ITGAX	CAST	CRPPA
			CLEC14A	CAV1	DAG1
				CD274	FKRP
				CD33	FKTN
				CDC34	FLI1
				CDCP1	GAA
				CDV3	GATA1
				CHRNA6	HBB
				CLIC4	INPP5K
				CLIP1	IRAK1
				CMPK1	JAK2
				CPD	KCNN4
				CTSB	LARGE1
				CTSZ	LYST
				CTTNBP2NL	MPL
				CYFIP1	MVK
				CYTH2	MYC
				DCAF12	PIEZO1
				DDX21	PLA2G6
				DDX3X	PLEC
				DPM3	PNPLA2
				DPP4	POMGNT1
				DR1	POMGNT2
				DRAM1	POMK
				DSC2	POMT1
				EFR3A	POMT2
				EIF4G2	RB1
				ELF1	RHAG
				EMP1	RPS14
				ENOX2	RXYLT1
				EPAS1	SIL1
				EPS15	SLC25A13
				FASTK	SLC4A1
				FCRL5	SLC7A7
				FLNA	SPP1
				FNDC3B	STAT4
				FOSL2	TET2
				GCLM	TP53
				GFER	USB1
				GNPTAB	VPS13A
				GNS	AIFM1
				HBEGF	COA8
				HLA.DMA	COQ8A
				HLA.DMB	COX10
				HLA.DPA1	COX14
				HLA.DPB1	COX15
				HLA.DQA1	COX20
				HLA.DQB1	COX4I1
				HLA.DRB5	COX6B1
				HLA.E	COX8A
				HSD11B1L	DARS2
				HSPBP1	ECHS1
				ICAM1	FOXRED1
				IL13RA1	GFM1
				IL6ST	GFM2
				INO80E	HTRA2
				IQGAP1	LIPT1
				IRAK2	LONP1
				IRF2BP1	LRPPRC
				ITGAV	MDH2
				ITGB3	MECP2
				ITGB6	MPV17
				JAK1	MRPS34
				KCTD20	MTFMT
				KIF2A	NARS2
				KLHL2	NAXE
				KPNA3	NDUFA1
				LAMC1	NDUFA10
				LAP3	NDUFA11
				LEPROT	NDUFA12
				LGMN	NDUFA13
				LIMS1	NDUFA2
				LITAF	NDUFA4
				LRP10	NDUFA6
				LUZP1	NDUFA9
				MAPKAPK2	NDUFAF1
				MAZ	NDUFAF2
				MBNL1	NDUFAF4
				MCL1	NDUFAF5
				MPND	NDUFAF6
				MPST	NDUFAF8
				MRPL41	NDUFB10
				MRPL43	NDUFB11
				MSN	NDUFB3
				MYH9	NDUFB9
				MYO1E	NDUFS1
				MYOF	NDUFS3
				NAMPT	NDUFS4
				NCK1	NDUFS6
				NCOA7	NDUFS7
				NECAB3	NDUFS8
				NECAP2	NDUFV1
				NEDD4	NDUFV2
				NFKB1	NUBPL
				NIPAL2	PDHA1
				NOTCH2	PDHX
				NR2F6	PET100
				NRBF2	PET117
				NTHL1	PNPT1
				NUBP2	RARS2
				OSBPL8	RMND1
				OSMR	SDHA
				OSTM1	SLC13A3
				PALLD	SLC19A3
				PARP4	SLC25A19
				PELP1	SLC39A8
				PGM2	TACO1
				PICALM	TIMMDC1
				PLS3	TMEM126B
				PLSCR1	TRAPPC12
				PPTC7	TRMT10C
				PRKAR2A	TXN2
				PRNP	AARS2
				PRSS23	ACAT1
				PTGFR	ACAT2
				PTOV1	ADAMTS13
				PTP4A2	AGK
				PTPN1	ATAD3A
				RAB23	ATPAF2
				RAB5C	BCS1L
				RAP1A	C1QBP
				RAP2B	CA5A
				RCAN1	CARS2
				RDX	CHCHD10
				RECQL	CLPB
				REST	COQ2
				RFXANK	COQ4
				ROCK1	COQ9
				ROCK2	COX5A
				RRAGC	COX6A2
				RUNX1	CYC1
				SDCBP	DGUOK
				SERPINB1	DLD
				SESTD1	DNAJC19
				SETD7	EARS2
				SH3GLB1	FARS2
				SLC43A3	FASTKD2
				SOCS3	FBXL4
				SPPL2A	FDX2
				STAT1	GOT2
				STK17A	GTPBP3
				SURF2	GYS2
				SUSD1	HIBCH
				SWAP70	HMGCL
				TAF13	HS6ST2
				TAP1	ISCA1
				TAP2	ISCU
				TCEA2	LIAS
				THAP7	LIPT2
				TLR3	LYRM7
				TMEM223	MICOS13
				TMEM9	MIPEP
				TMOD3	MPC1
				TPP1	MRPL12
				TRIM14	MRPL3
				TRMT2A	MRPL44
				TRPT1	MRPS14
				UHMK1	MRPS16
				USP12	MRPS22
				VAMP3	MRPS28
				VAMP7	MTO1
				VCL	NGLY1
				VGLL3	OCRL
				VRK2	OGDH
				WDR13	PC
				WDR44	PDP1
				WDR83	PDSS1
				WWTR1	PDSS2
				XAB2	PMPCB
				ZBTB38	PNPLA8
				ZDHHC20	PNPO
				ZMAT5	POLG
				ZNF414	POLG2
				ZNF580	PUS1
				ZNF768	PYGL
				ACTN1	RARS1
				ACTR3	RNASEH1
				ANXA5	RRM2B
				AP1M2	SCO1
				ARF6	SERAC1
				BAZ1A	SFXN4
				BCS1L	SLC25A10
				BNIP2	SLC25A26
				CCL22	SLC25A3
				CISD3	SLC25A4
				CNN3	SLC25A42
				CXCL16	SOD1
				CYLD	SYNJ1
				CYP2S1	TANGO2
				EIF2AK2	TARS2
				FAM114A1	TIMM22
				FKBP15	TIMM50
				FOSL1	TK2
				FUT11	TMEM70
				GM2A	TRMT5
				GNAI2	TRMU
				GNAI3	TSFM
				GNG12	TUFM
				GPS1	TWNK
				HIF1A	UQCC3
				HIVEP1	UQCRB
				IFNGR1	UQCRC2
				ITGA2	UQCRQ
				ITGB1	WARS2
				KLF6	YARS2
				MACROD1
				MAP3K7
				MIER1
				MMP14
				MRAS
				MRPL53
				MTX1
				MVP
				NCEH1
				NDUFS3
				NFKBIL1
				OPTN
				OSTF1
				PARVA
				PCYT1A
				PCYT2
				RECQL5
				RELB
				RFNG
				RNF145
				RP2
				SEC23A
				SEC23IP
				SHARPIN
				SLC2A9
				SLC30A7
				SNX6
				TAB2
				TEX264
				TLN1
				TMED10
				TNFRSF10A
				TPM4
				UBE2J1
				UGCG
				VARS2
				VPS4B
				CMTM6
				IRF2
