# Supplementary figures and images for: SLC39-driven zinc influx orchestrates pleiotropic tumor–immune crosstalk to establish an immune-suppressive microenvironment in colorectal cancer
Source: Research Square preprint supplement (doi:10.21203/rs.3.rs-8267774/v1), 2025-12-22

Fig. 3H

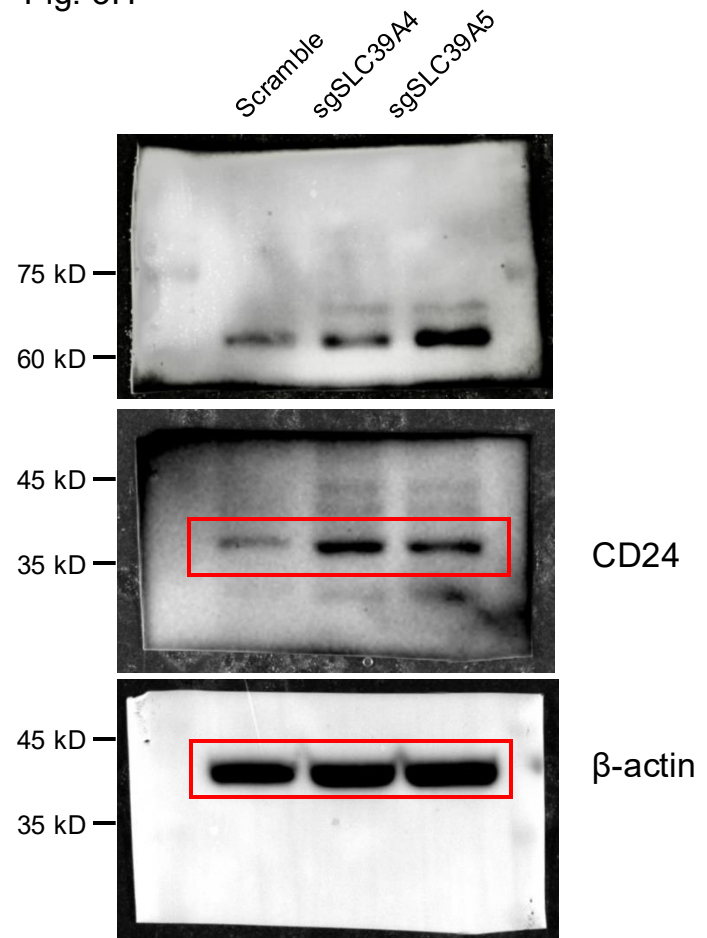

Supplement: Supplementary file 2 [file faabaf787cb72878b8e027da.pdf]
